# Supplementary material for: Practical preparation of diphenylmethyl ethers from 2-diphenylmethoxypyridine using catalytic iron(iii) chloride
Source: Royal Society of Chemistry journal article supplement (doi:10.1039/c9ob01093a), 2019-01-01
Supplement: c9ob01093a1.pdf [file c9ob01093a1.pdf]

## Supporting Information

### Practical Preparation of Diphenylmethyl Ethers from 2-Diphenylmethoxypyridine using Catalytic Iron(III) Chloride

Van Hieu Tran <sup>a,b</sup>, Minh Thanh La <sup>a,b</sup>, Hee-Kwon Kim <sup>a,b,\*</sup>

<sup>a</sup> Department of Nuclear Medicine, Molecular Imaging & Therapeutic Medicine Research Center, Chonbuk National University Medical School and Hospital, Jeonju, 54907, Republic of Korea

<sup>b</sup> Research Institute of Clinical Medicine of Chonbuk National University-Biomedical Research Institute of Chonbuk National University Hospital, Jeonju, 54907, Republic of Korea

\* Corresponding author.

Tel: +82 63 250 2768; Fax: +82 63 255 1172.

*E-mail address:* hkkim717@jbnu.ac.kr (H. Kim).

## Table of Contents

|                                                                                    |    |
|------------------------------------------------------------------------------------|----|
| $^1\text{H}$ and $^{13}\text{C}$ NMR Spectra of compounds 4a-4s, 6a-6l and 8 ..... | S2 |
|------------------------------------------------------------------------------------|----|

## 2-(Benzhydryloxy)pyridine (2)

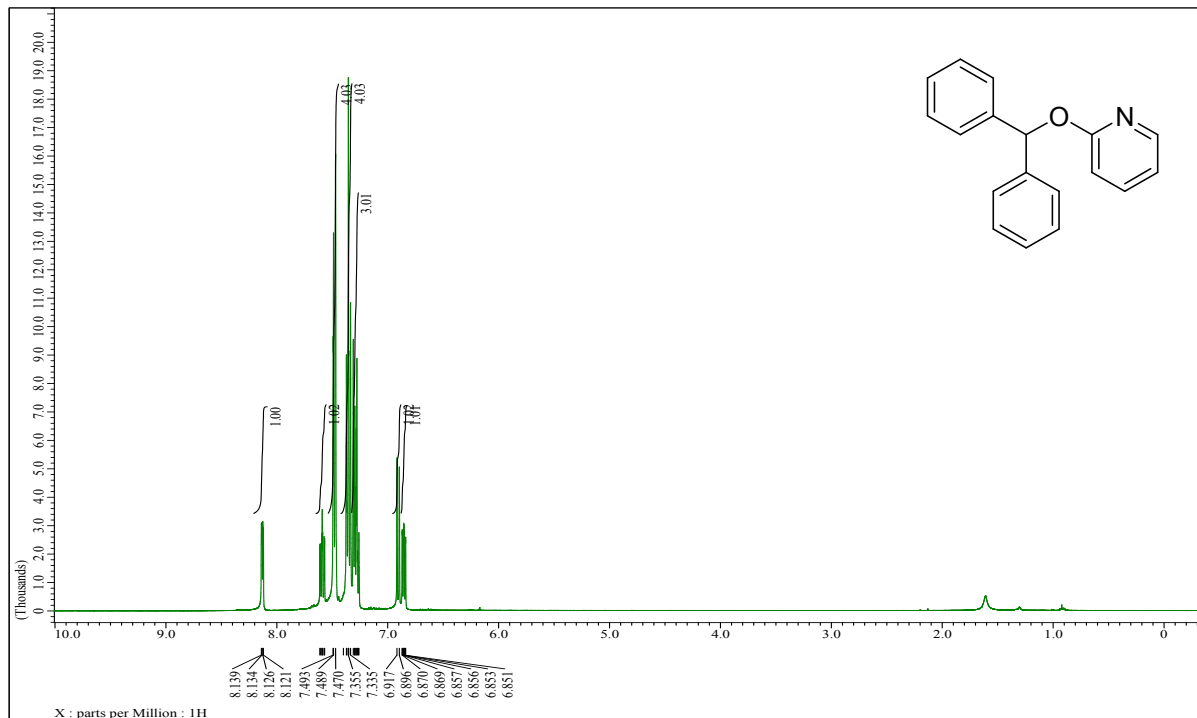

## <sup>1</sup>H NMR spectrum of 2-diphenylmethoxy pyridine (2)

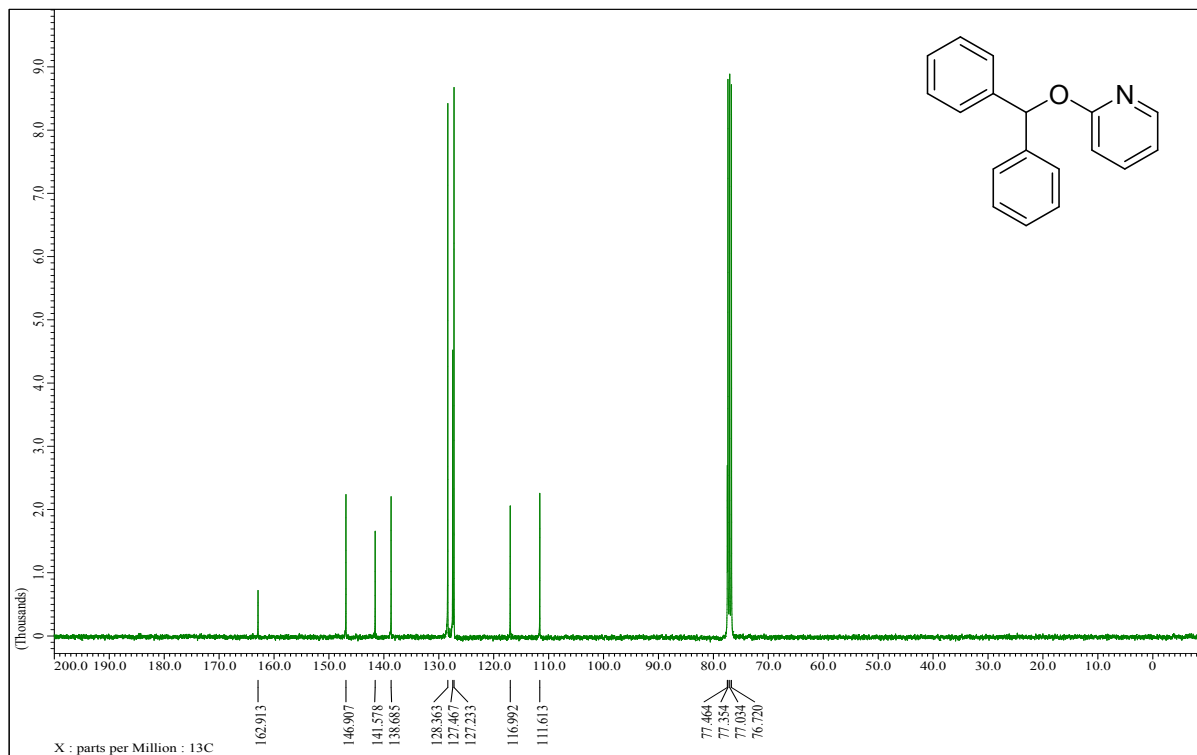

## <sup>13</sup>C NMR spectrum of 2-diphenylmethoxy pyridine (2)

### Benzyloxymethylene)dibenzene (4a)

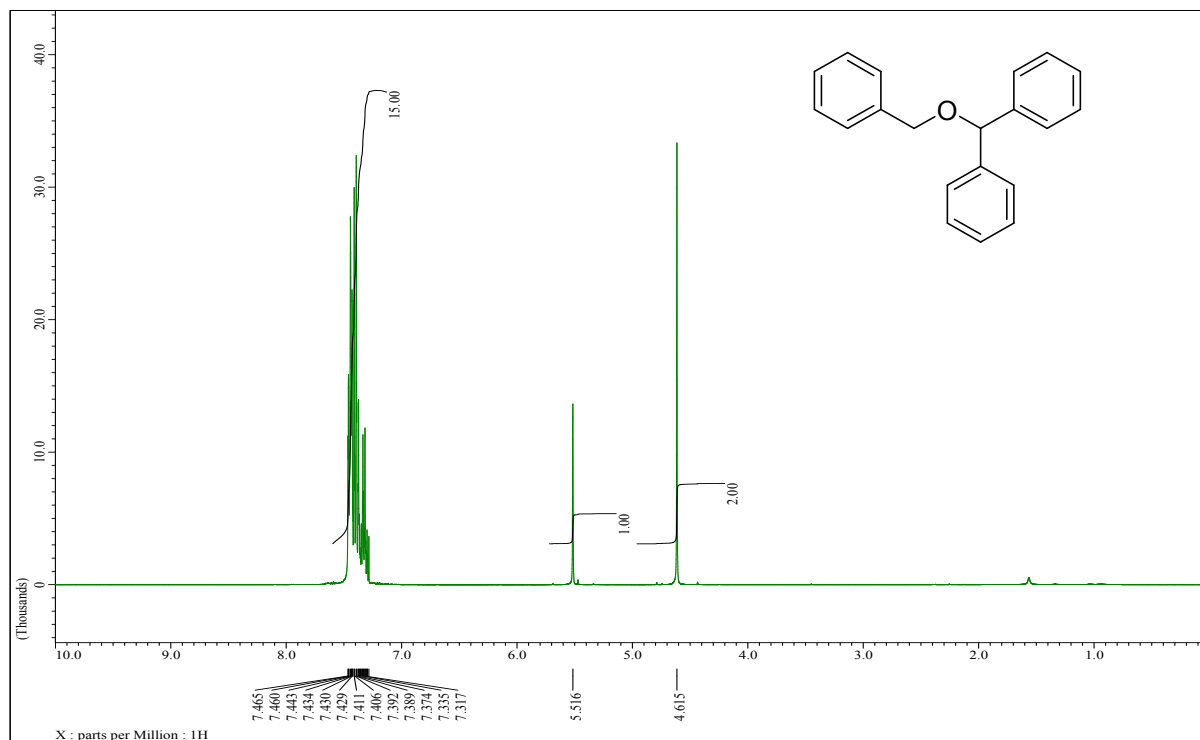

### <sup>1</sup>H NMR spectrum of Benzyloxymethylene)dibenzene (4a)

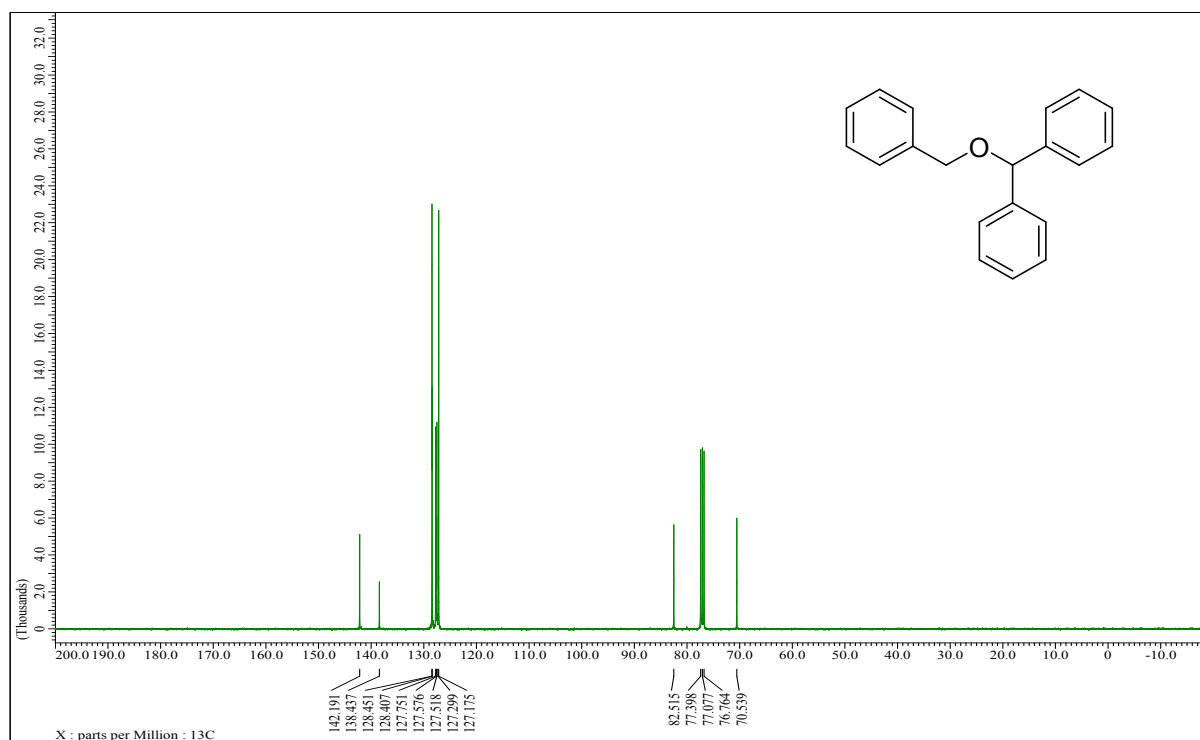

### <sup>13</sup>C NMR spectrum of Benzyloxymethylene)dibenzene (4a)

### Butoxymethylene)dibenzene (4b)

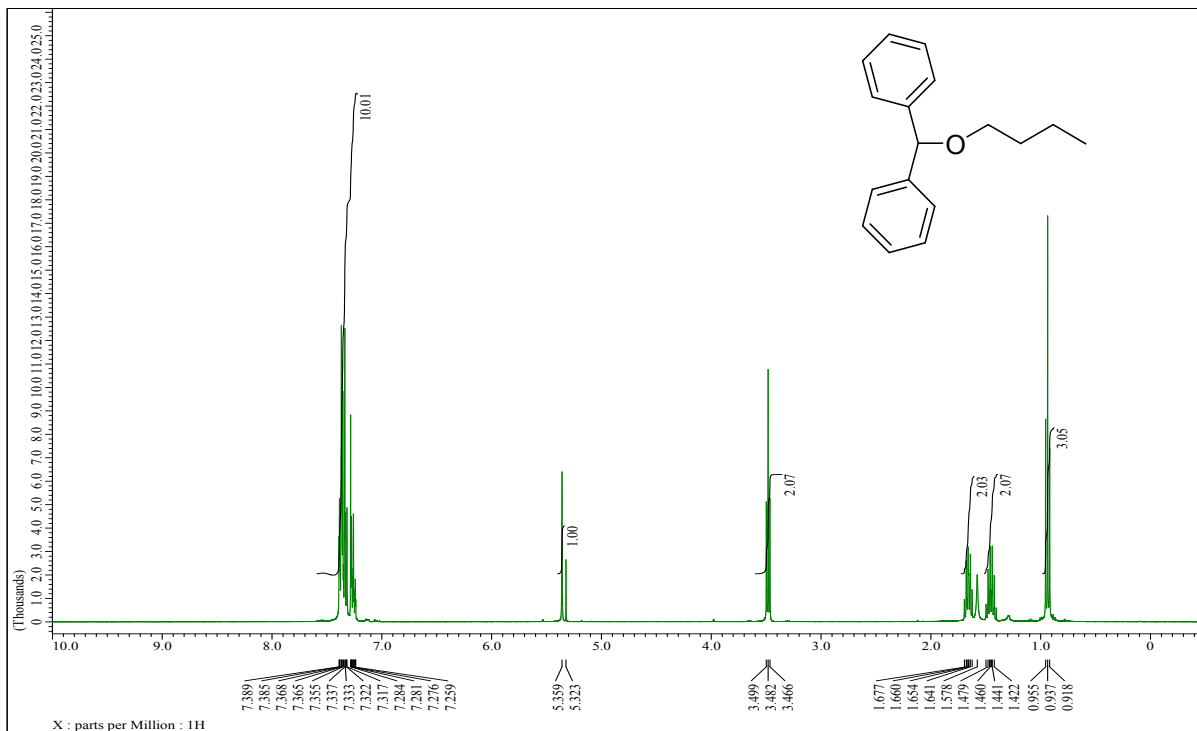

### <sup>1</sup>H NMR spectrum of Butoxymethylene)dibenzene (4b)

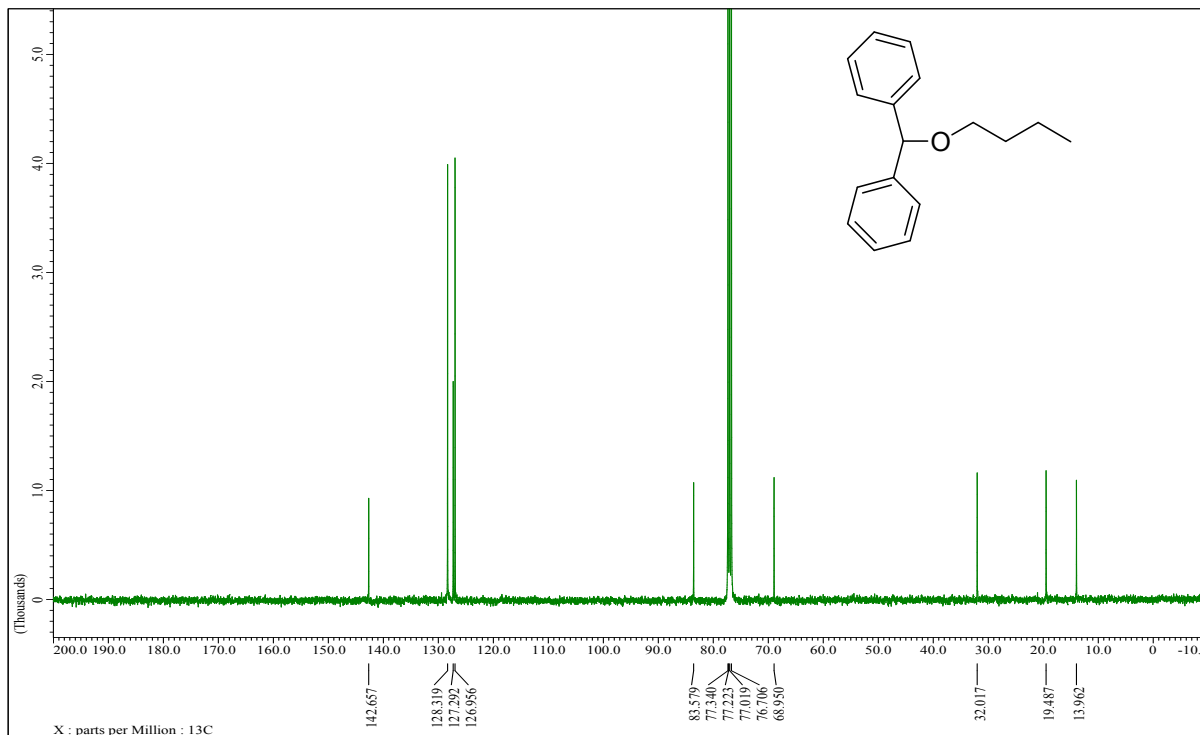

### <sup>13</sup>C NMR spectrum of Butoxymethylene)dibenzene (4b)

### (Heptyloxymethylene)dibenzene (4c)

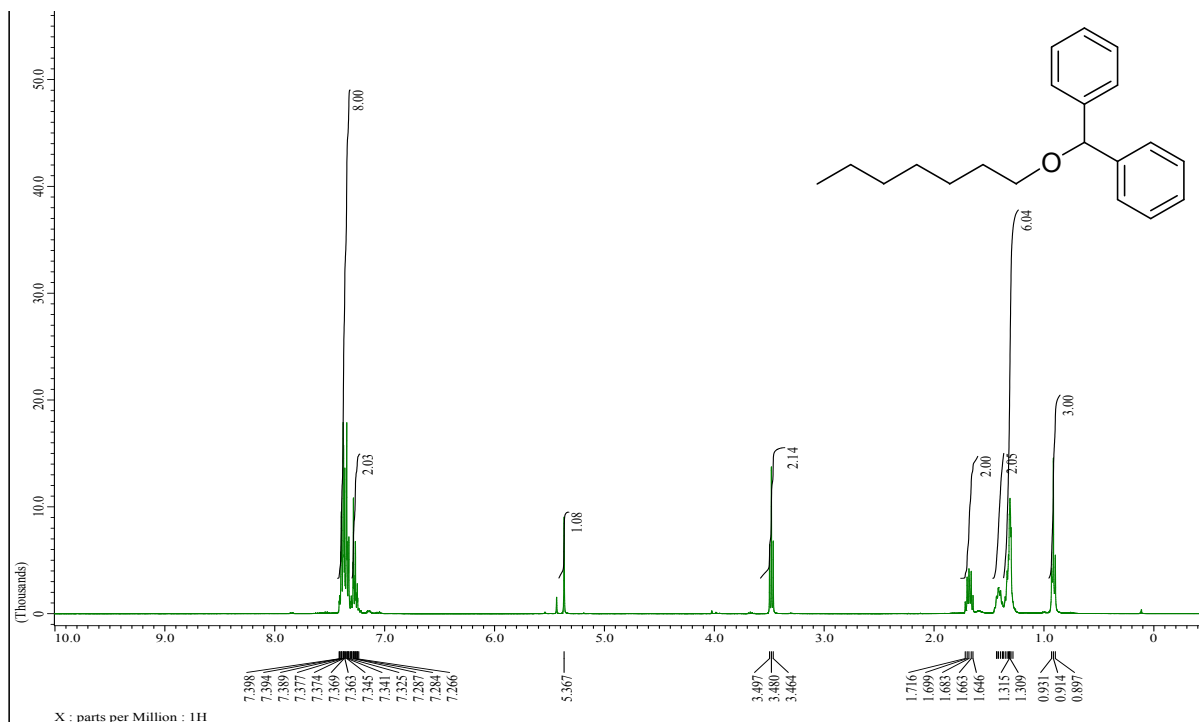

### <sup>1</sup>H NMR spectrum of (Heptyloxymethylene)dibenzene (4c)

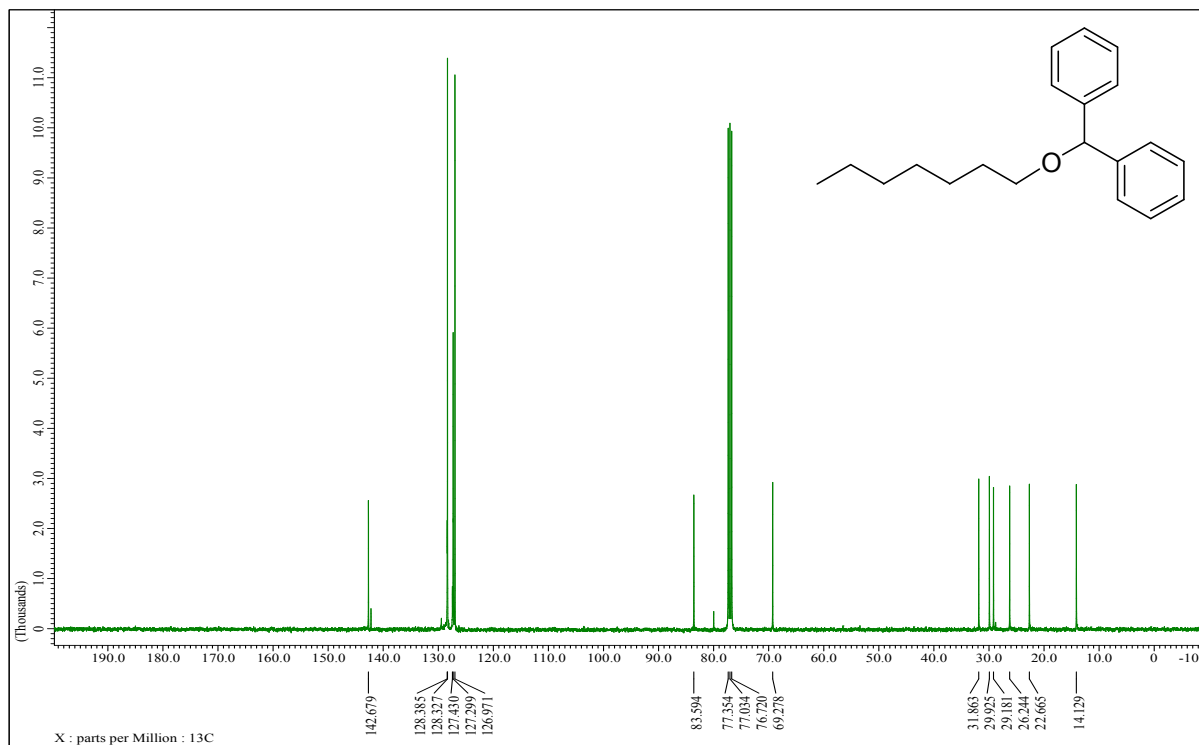

### <sup>13</sup>C NMR spectrum of (Heptyloxymethylene)dibenzene (4c)

### (Cyclopropylmethoxy)methylene)dibenzene (4d)

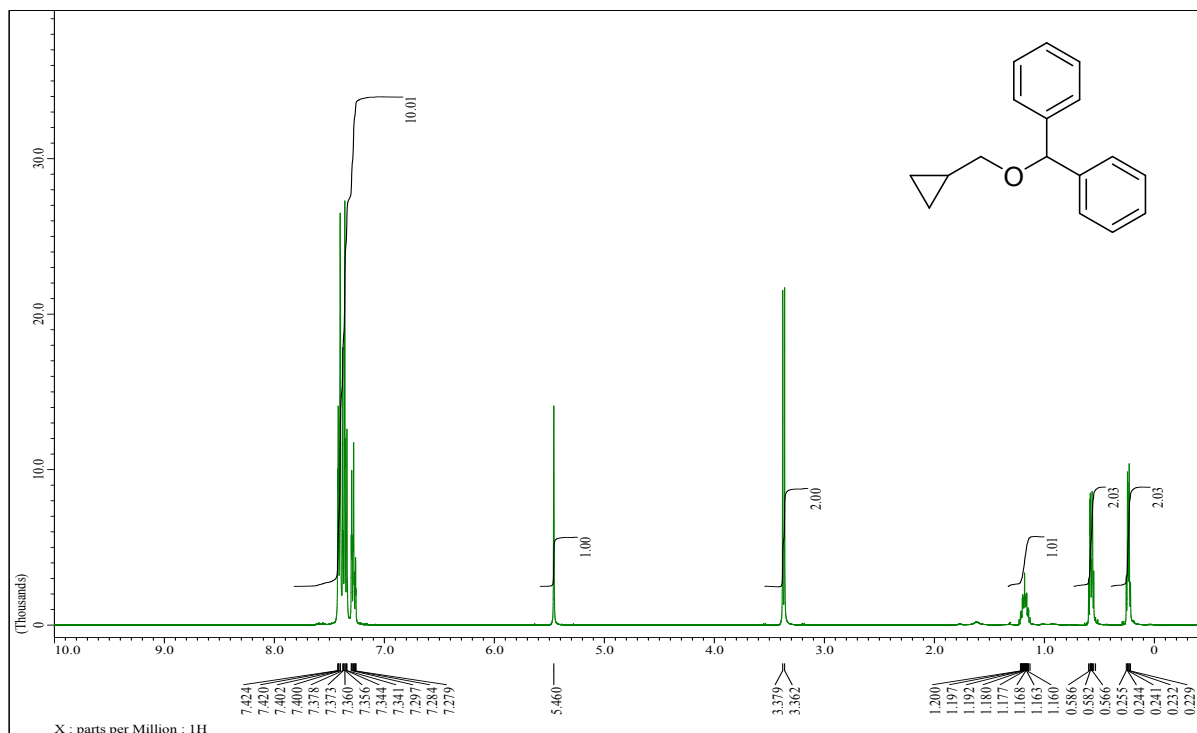

### <sup>1</sup>H NMR spectrum of (Cyclopropylmethoxy)methylene)dibenzene (4d)

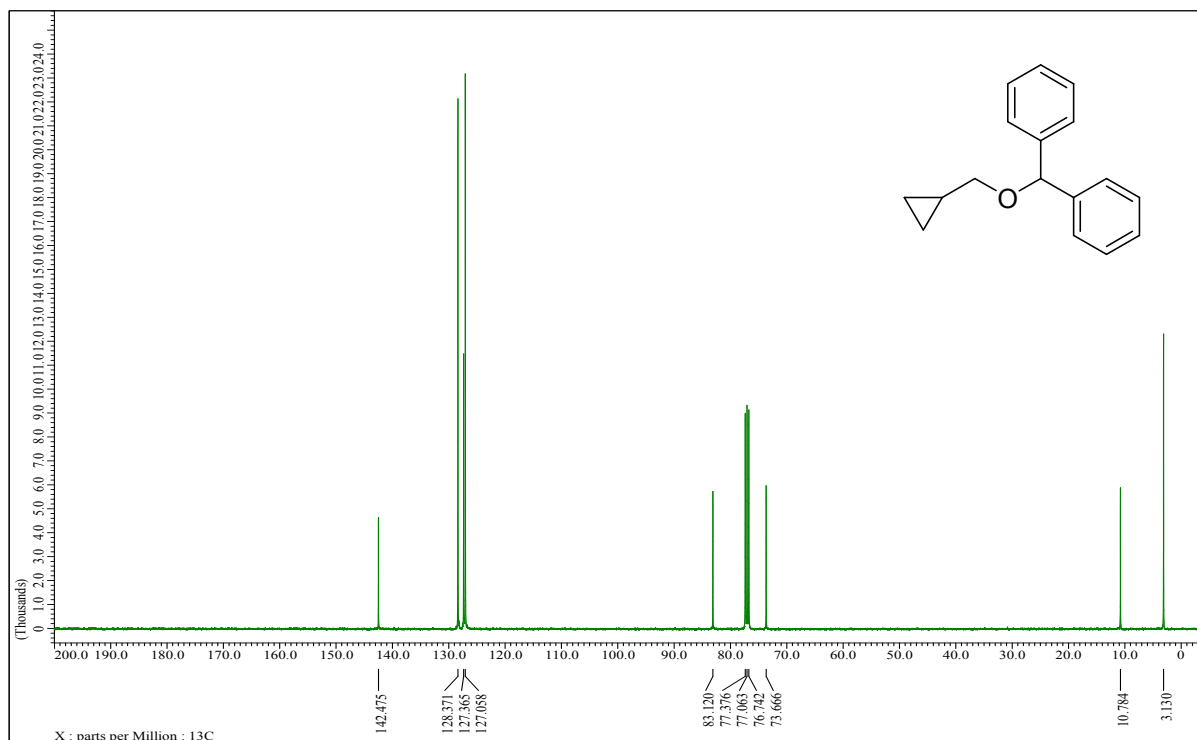

### <sup>13</sup>C NMR spectrum of (Cyclopropylmethoxy)methylene)dibenzene (4d)

(Allyloxymethylene)dibenzene (4e)

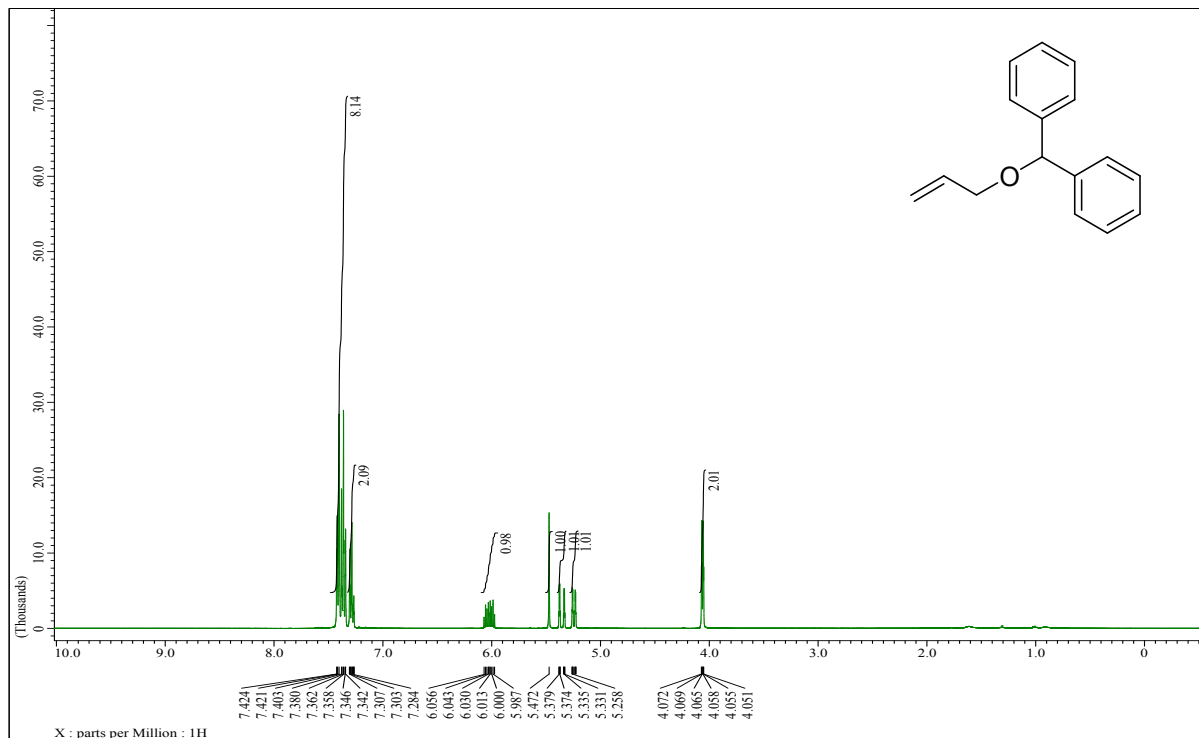

<sup>1</sup>H NMR spectrum of (Allyloxymethylene)dibenzene (4e)

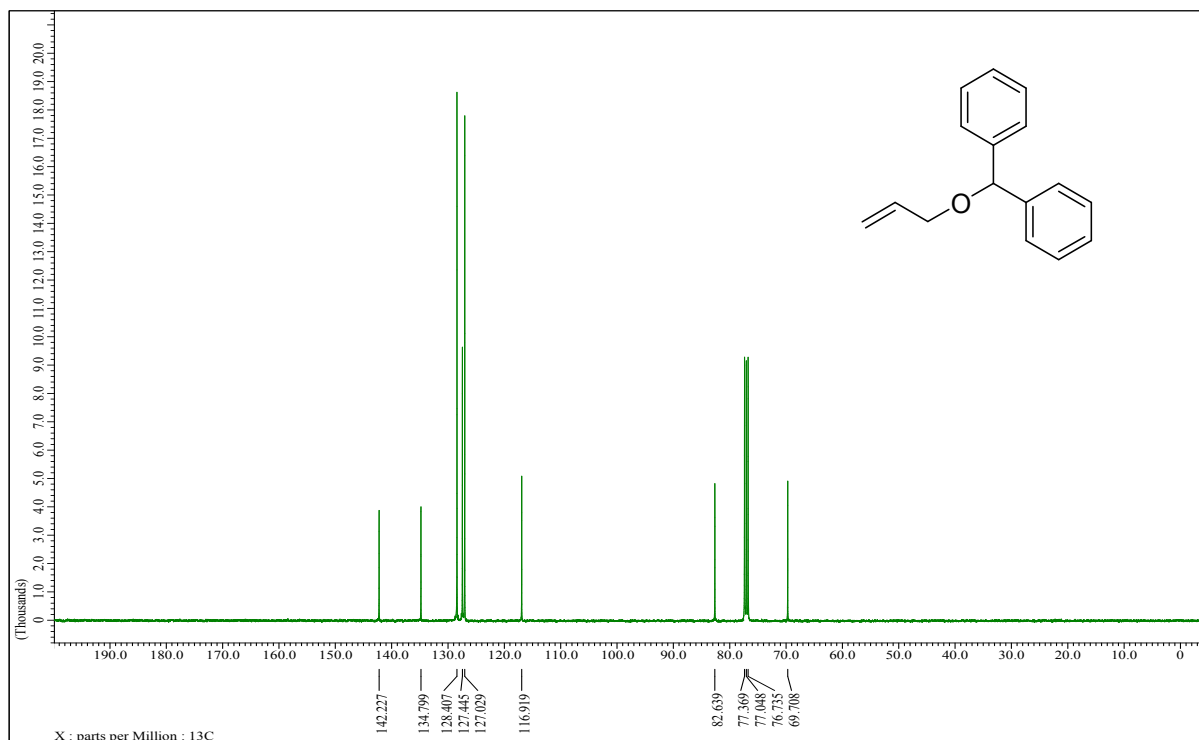

<sup>13</sup>C NMR spectrum of (Allyloxymethylene)dibenzene (4e)



**((Prop-2-ynyloxy)methylene)dibenzene (4f)**

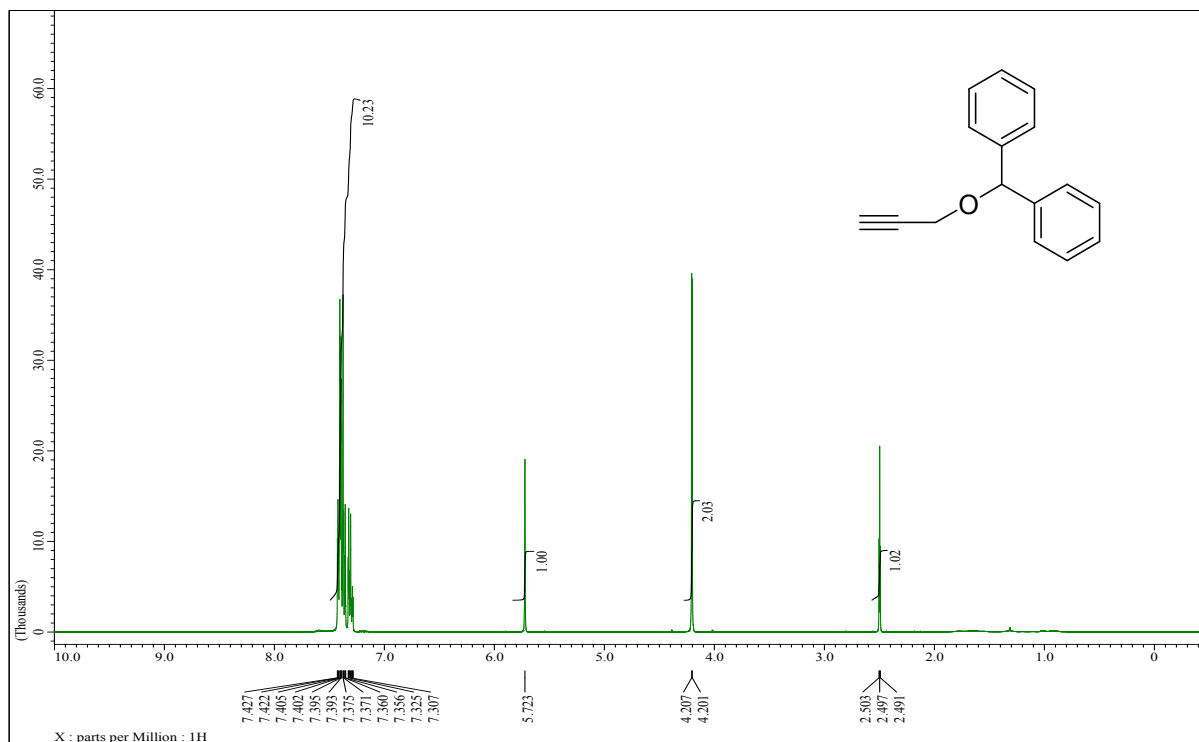

**<sup>1</sup>H NMR spectrum of ((Prop-2-ynyloxy)methylene)dibenzene (4f)**

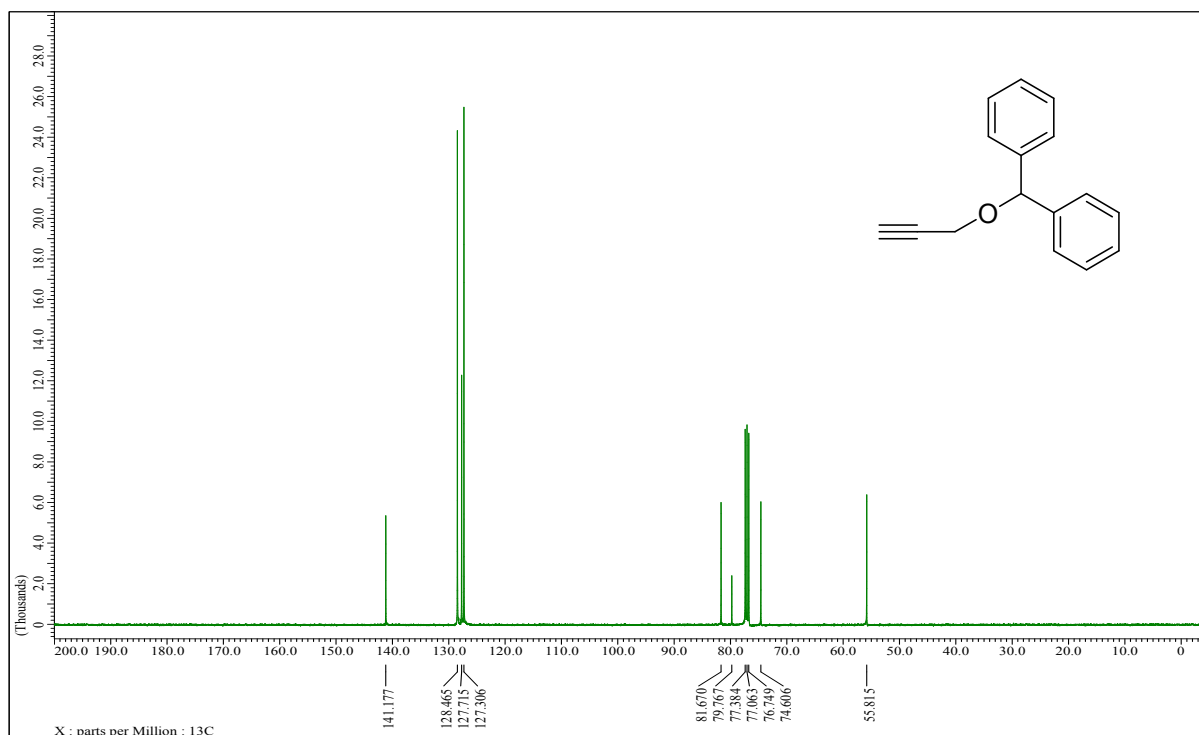

**<sup>13</sup>C NMR spectrum of ((Prop-2-ynyloxy)methylene)dibenzene (4f)**

(isopropoxymethylene)dibenzene (4g)

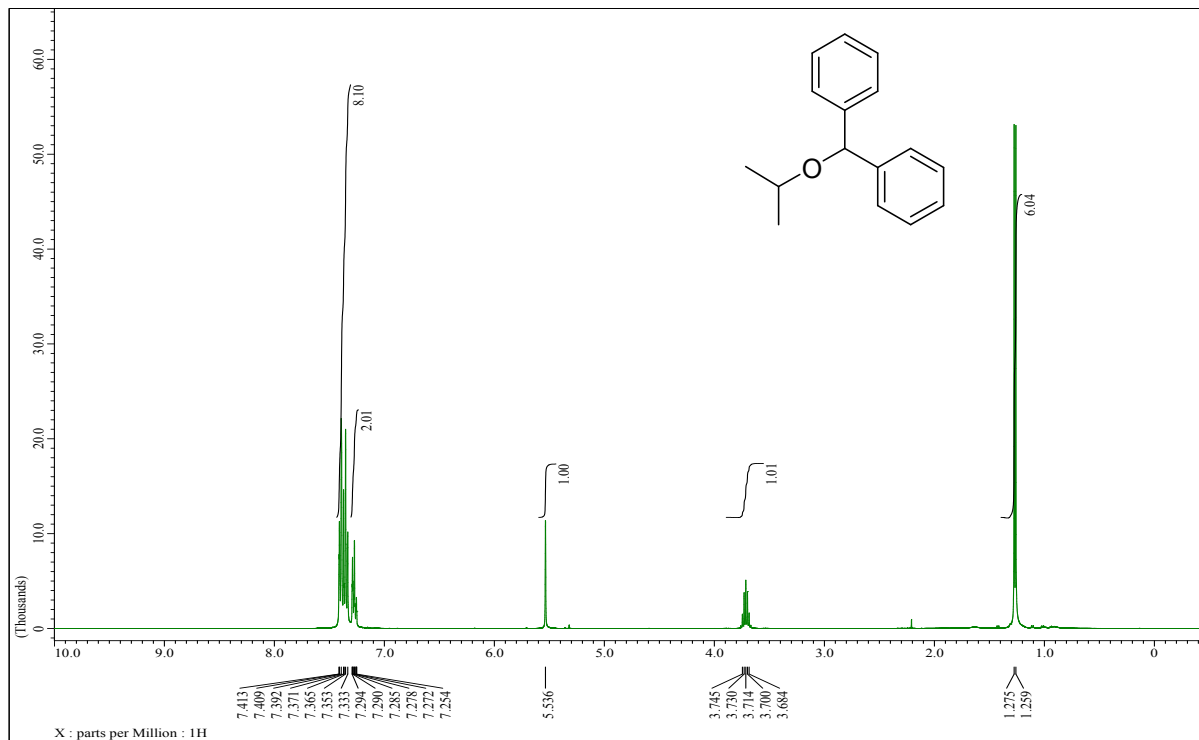

<sup>1</sup>H NMR spectrum of (isopropoxymethylene)dibenzene (4g)

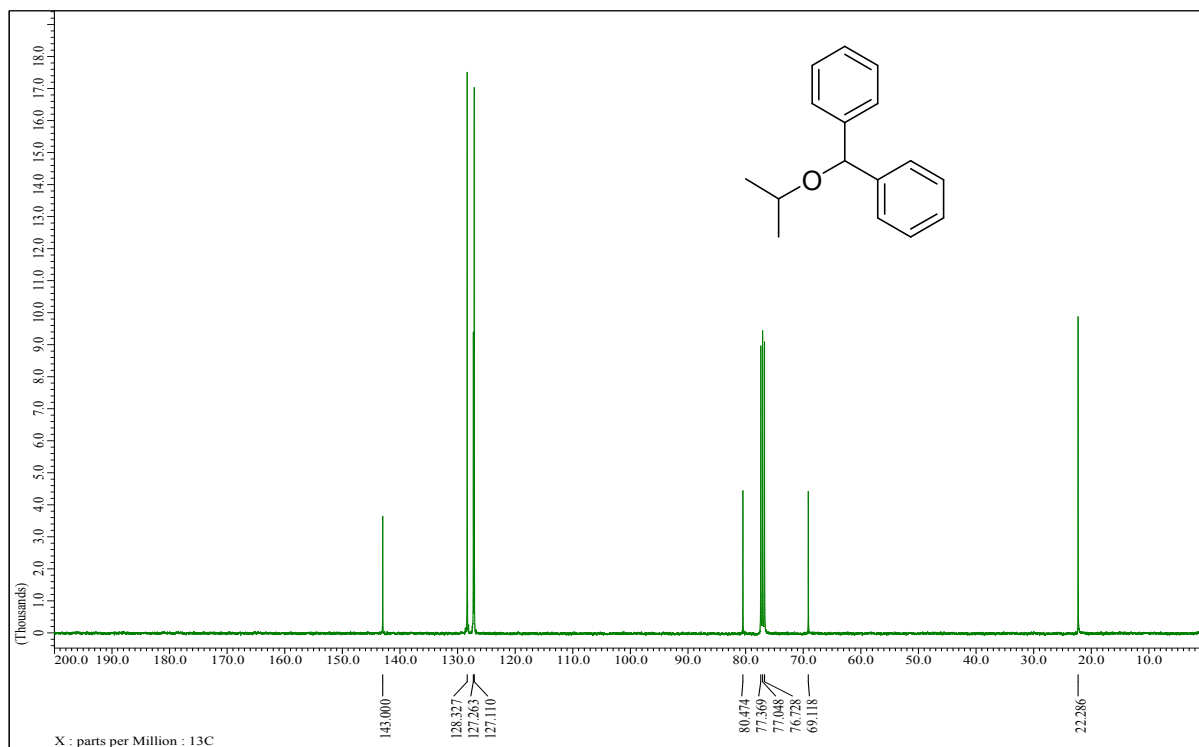

<sup>13</sup>C NMR spectrum of (isopropoxymethylene)dibenzene (4g)

(cyclohexyloxymethylene)dibenzene (**4h**)

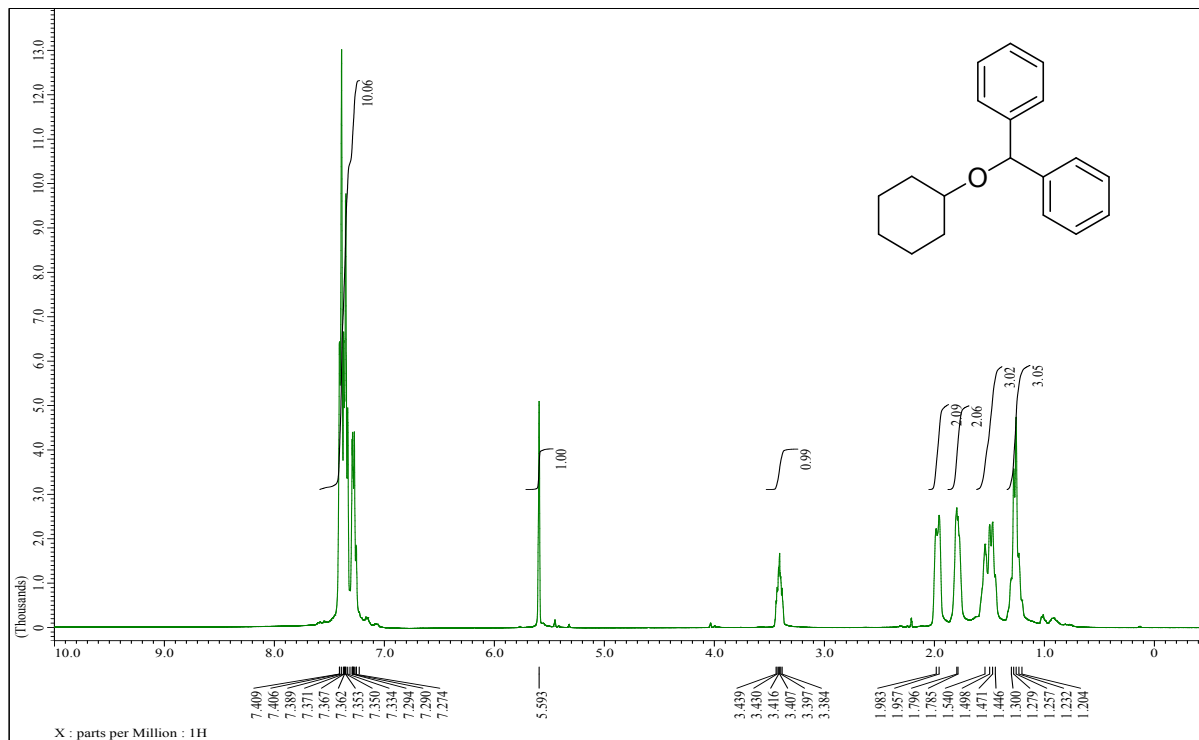

<sup>1</sup>H NMR spectrum of (cyclohexyloxymethylene)dibenzene (**4h**)

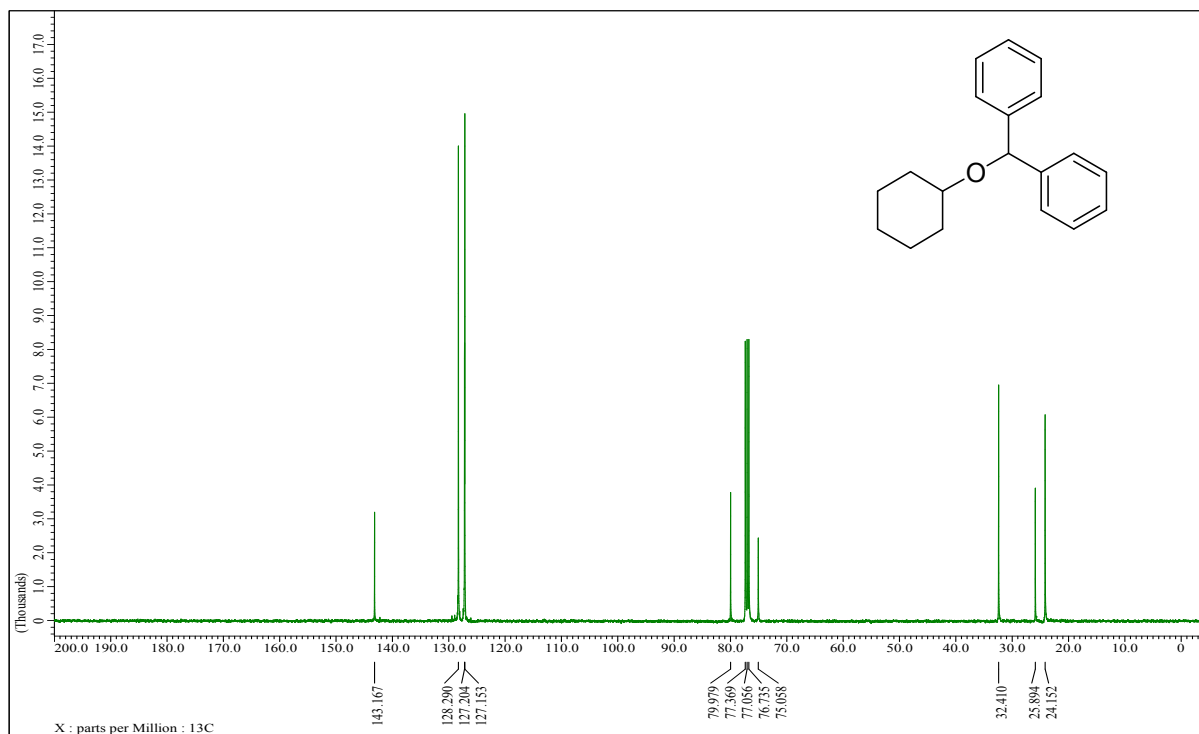

<sup>13</sup>C NMR spectrum of (cyclohexyloxymethylene)dibenzene (**4h**)

**(*tert*-butoxymethylene)dibenzene (4i)**

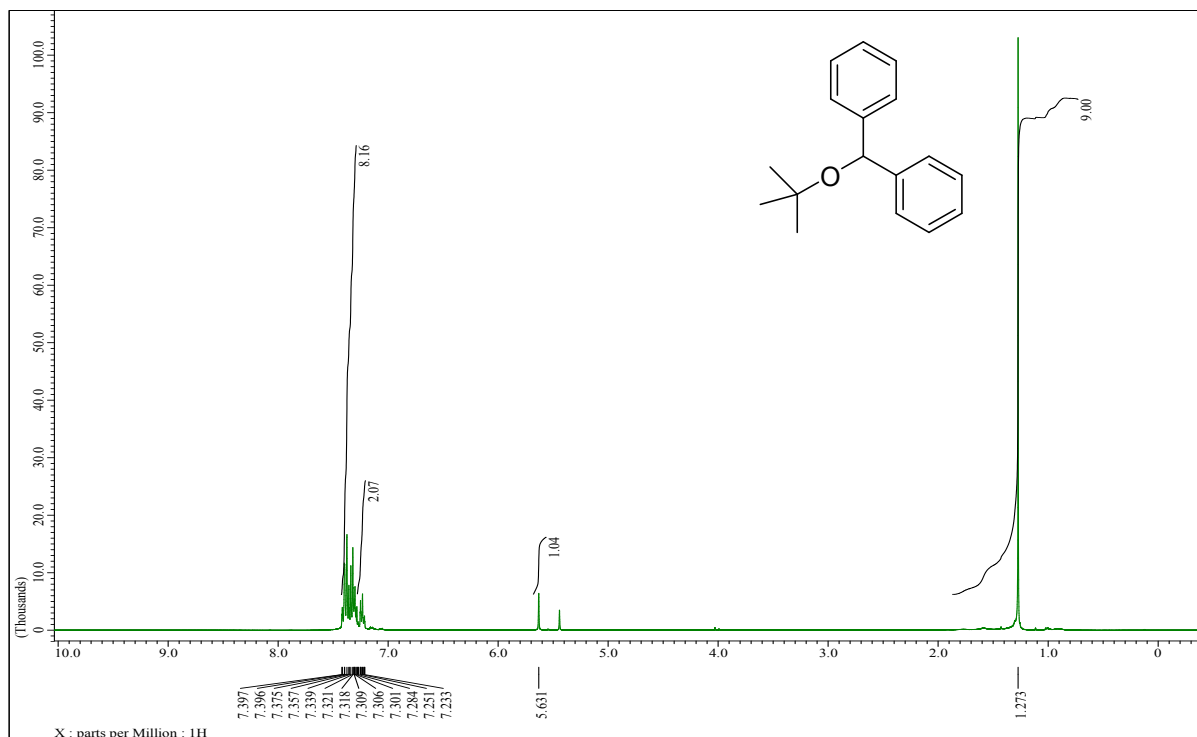

**<sup>1</sup>H NMR spectrum of (*tert*-butoxymethylene)dibenzene (4i)**

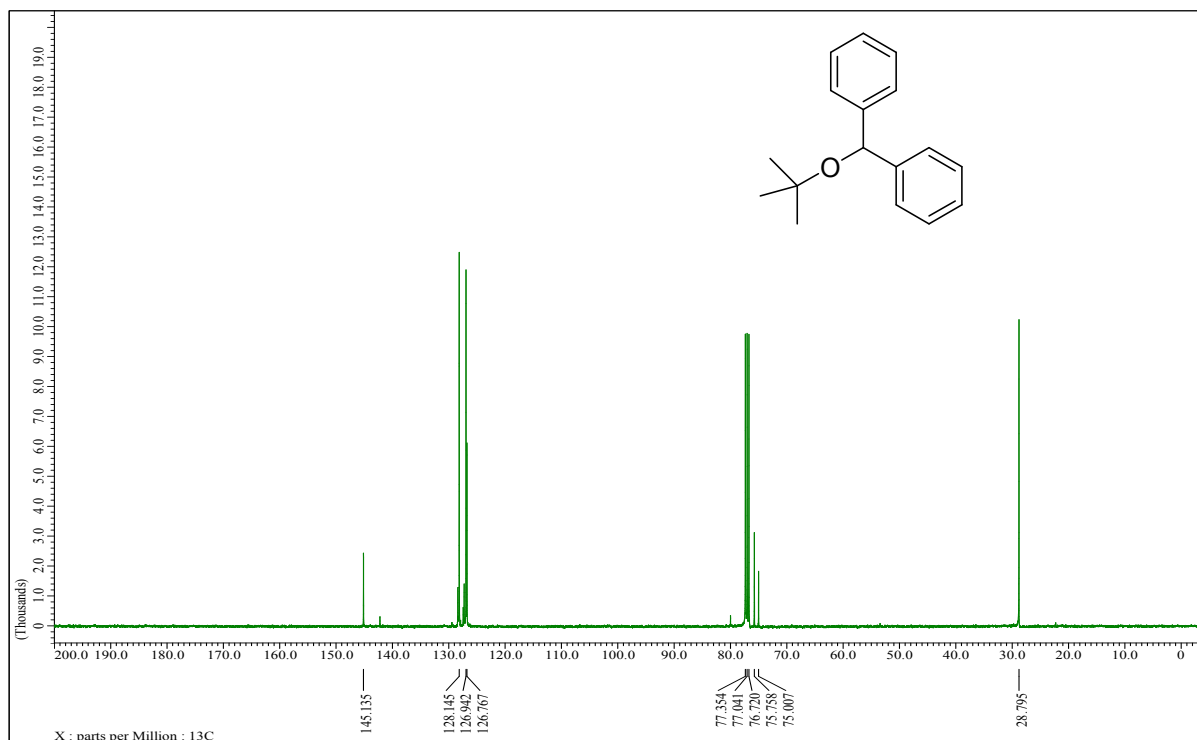

**<sup>13</sup>C NMR spectrum of (*tert*-butoxymethylene)dibenzene (4i)**

## Oxybis(methanetriyl)tetrabenzene (4j)

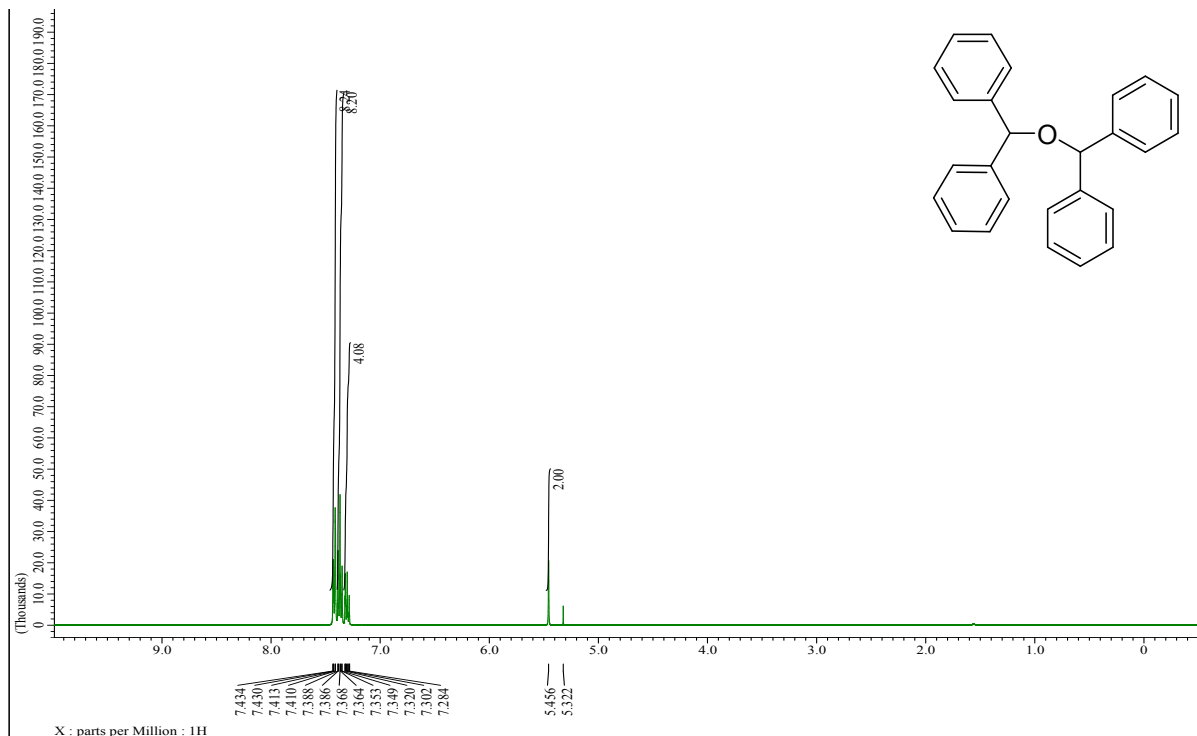

## <sup>1</sup>H NMR spectrum of oxybis(methanetriyl)tetrabenzene (4j)

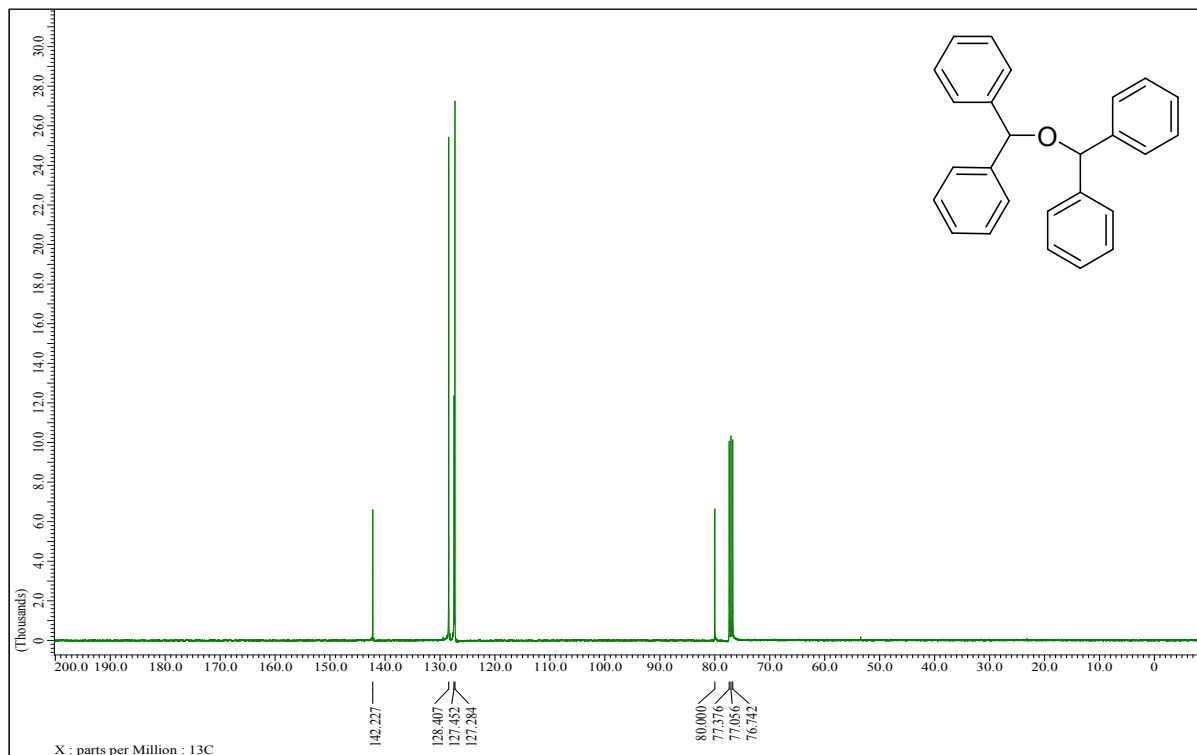

## <sup>13</sup>C NMR spectrum of oxybis(methanetriyl)tetrabenzene (4j)

**((3-bromopropoxy)methylene)dibenzene (4k)**

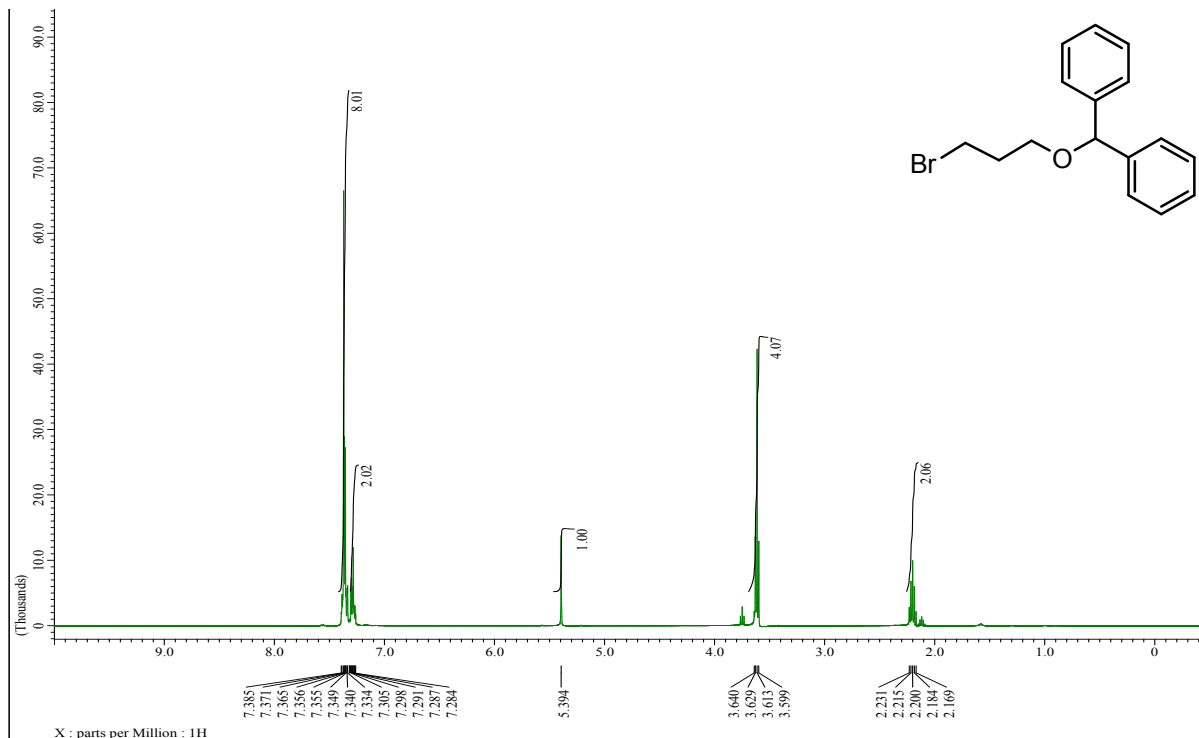

**<sup>1</sup>H NMR spectrum of ((3-bromopropoxy)methylene)dibenzene (4k)**

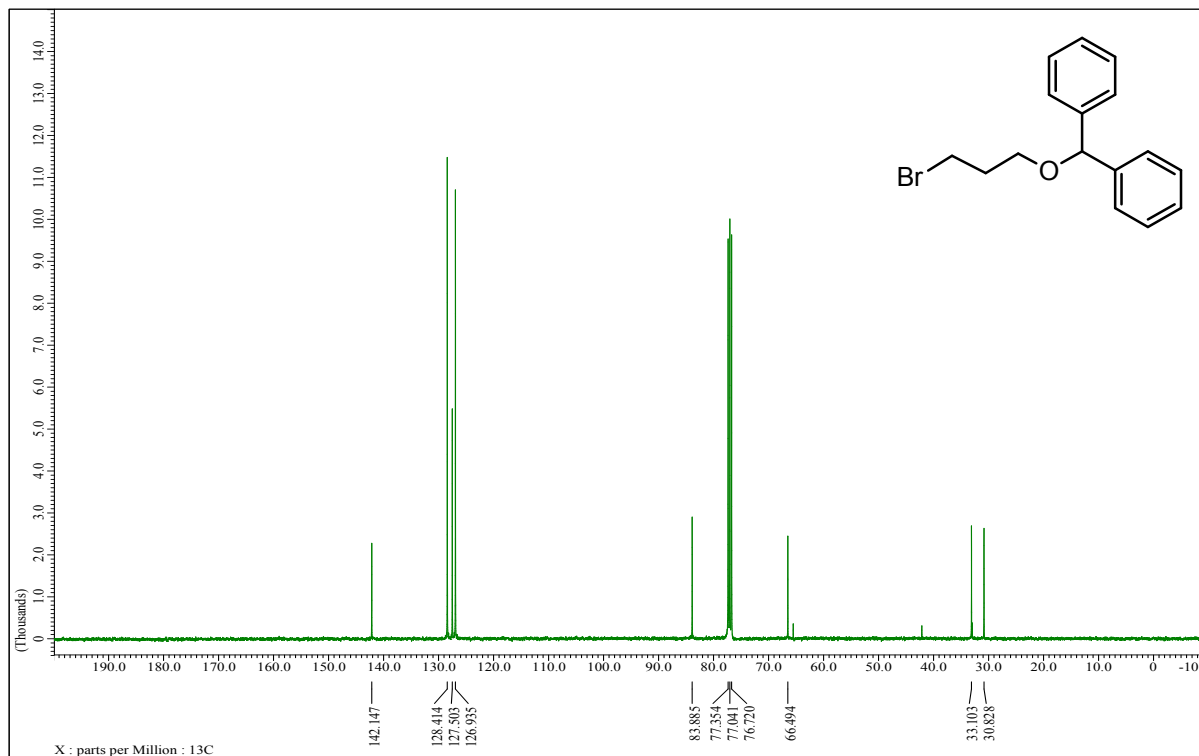

**<sup>13</sup>C NMR spectrum of ((3-bromopropoxy)methylene)dibenzene (4k)**

### 3-(benzhydryloxy)propan-1-ol (4I)

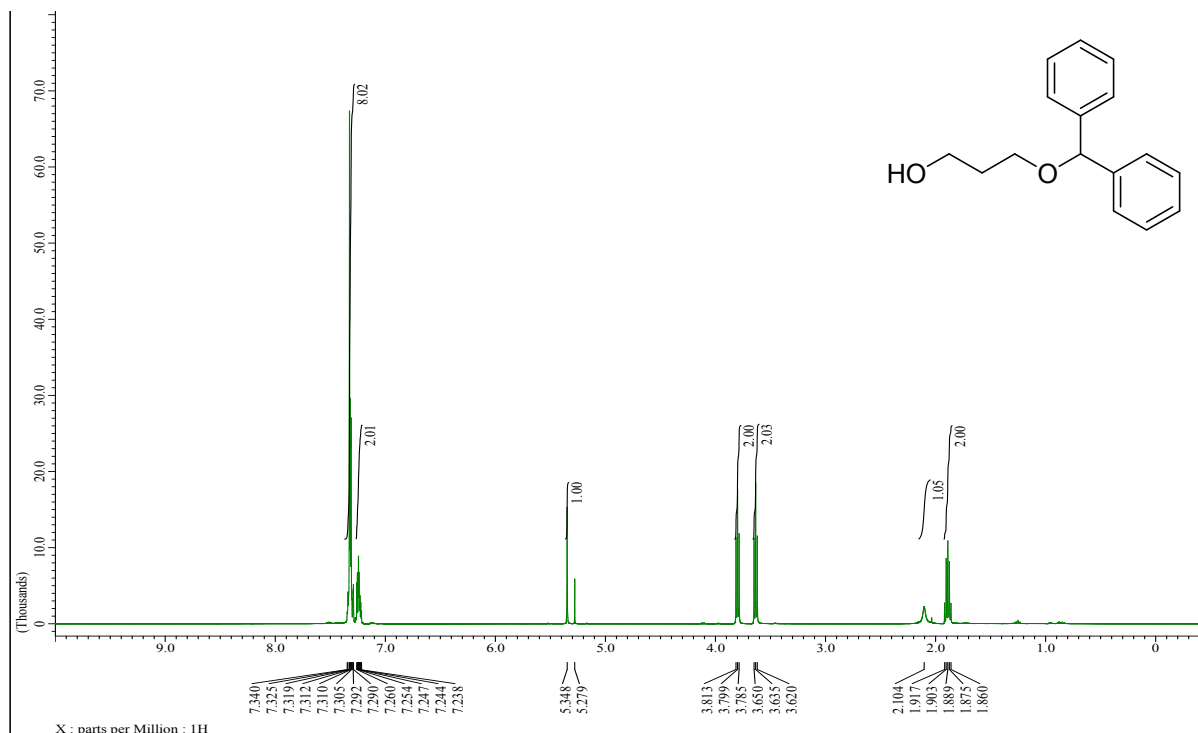

### <sup>1</sup>H NMR spectrum of 3-(benzhydryloxy)propan-1-ol (4I)

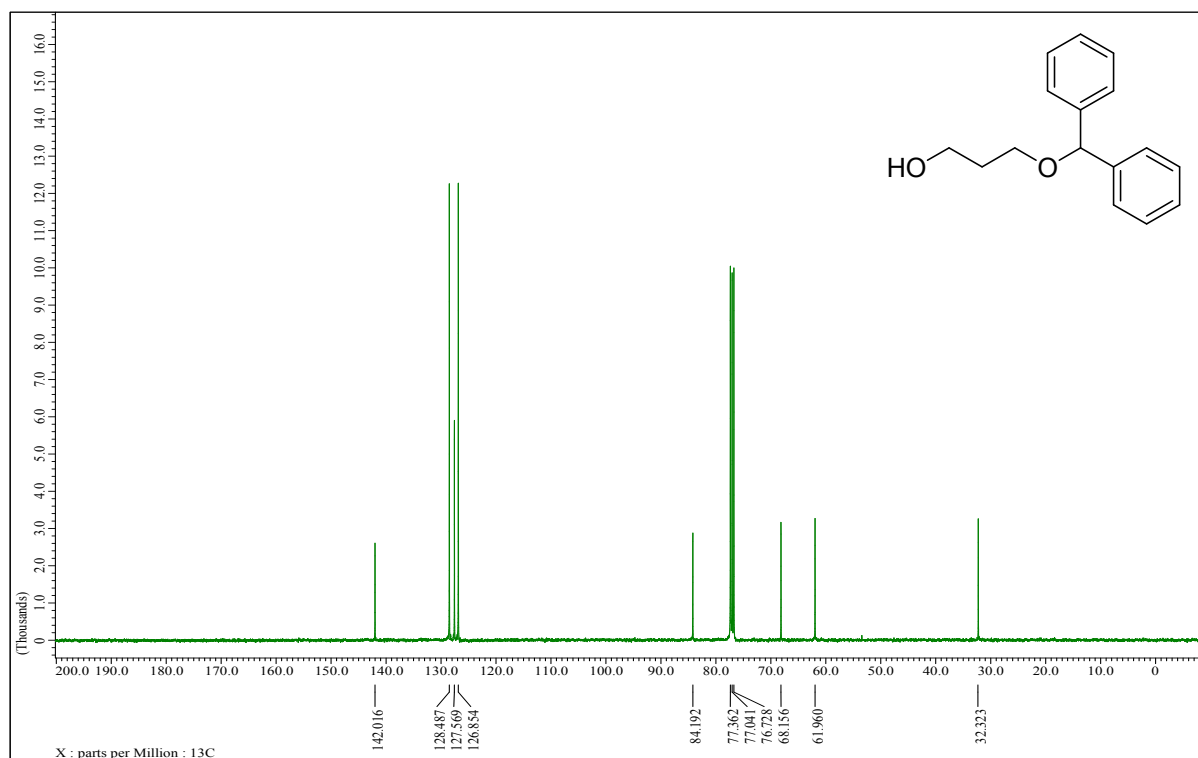

### <sup>13</sup>C NMR spectrum of 3-(benzhydryloxy)propan-1-ol (4I)

### (4-(benzhydryloxymethyl)cyclohexyl)methanol (4m)

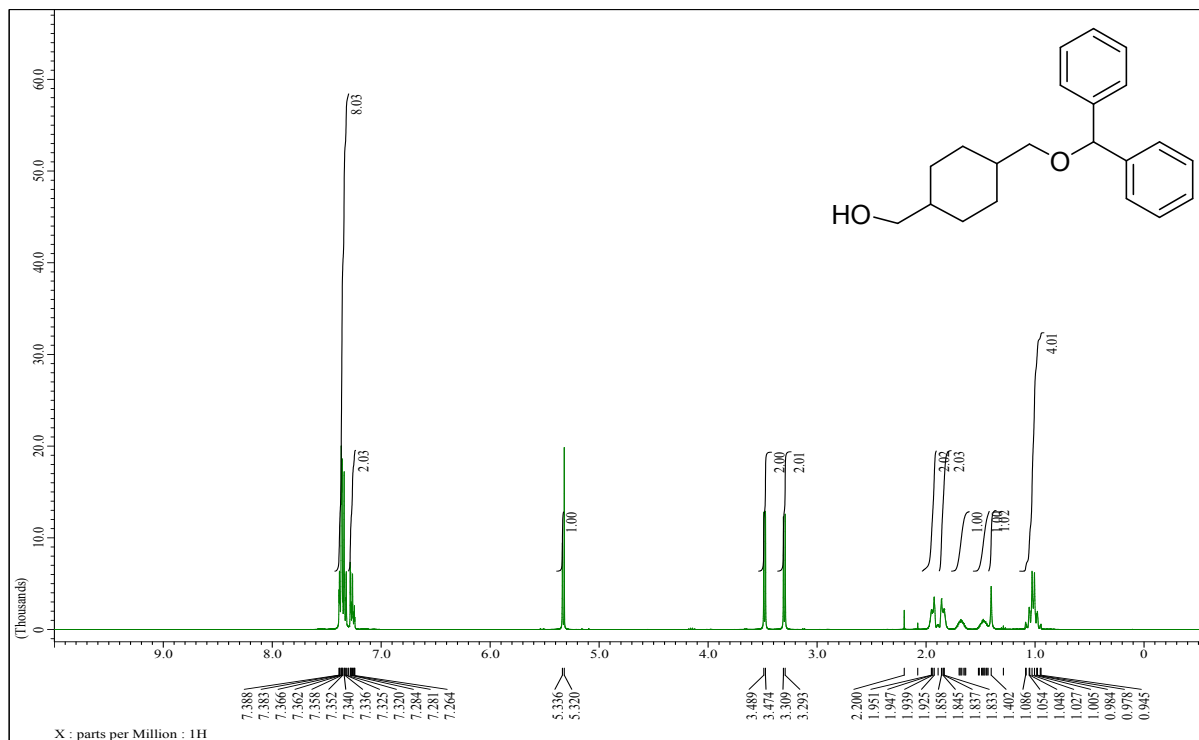

### <sup>1</sup>H NMR spectrum of (4-(benzhydryloxymethyl)cyclohexyl)methanol (4m)

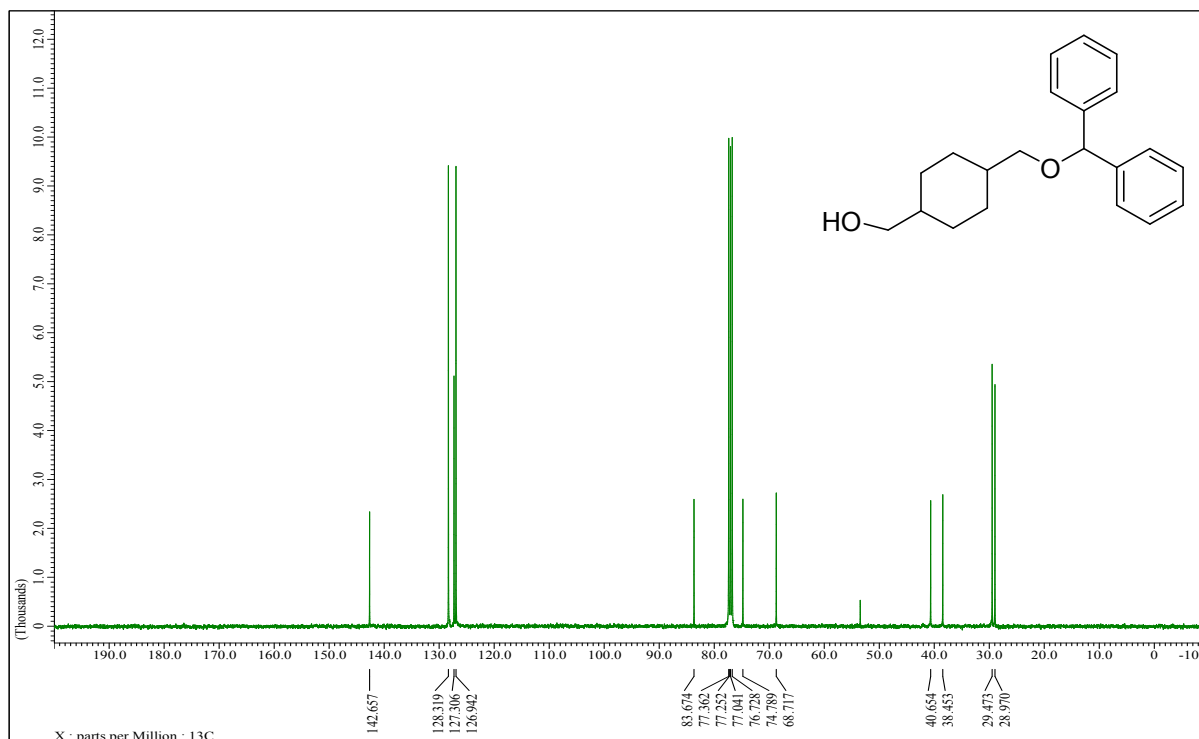

### <sup>13</sup>C NMR spectrum of (4-(benzhydryloxymethyl)cyclohexyl)methanol (4m)



### ((3-(benzyloxy)propoxy)methylene)dibenzene (4n)

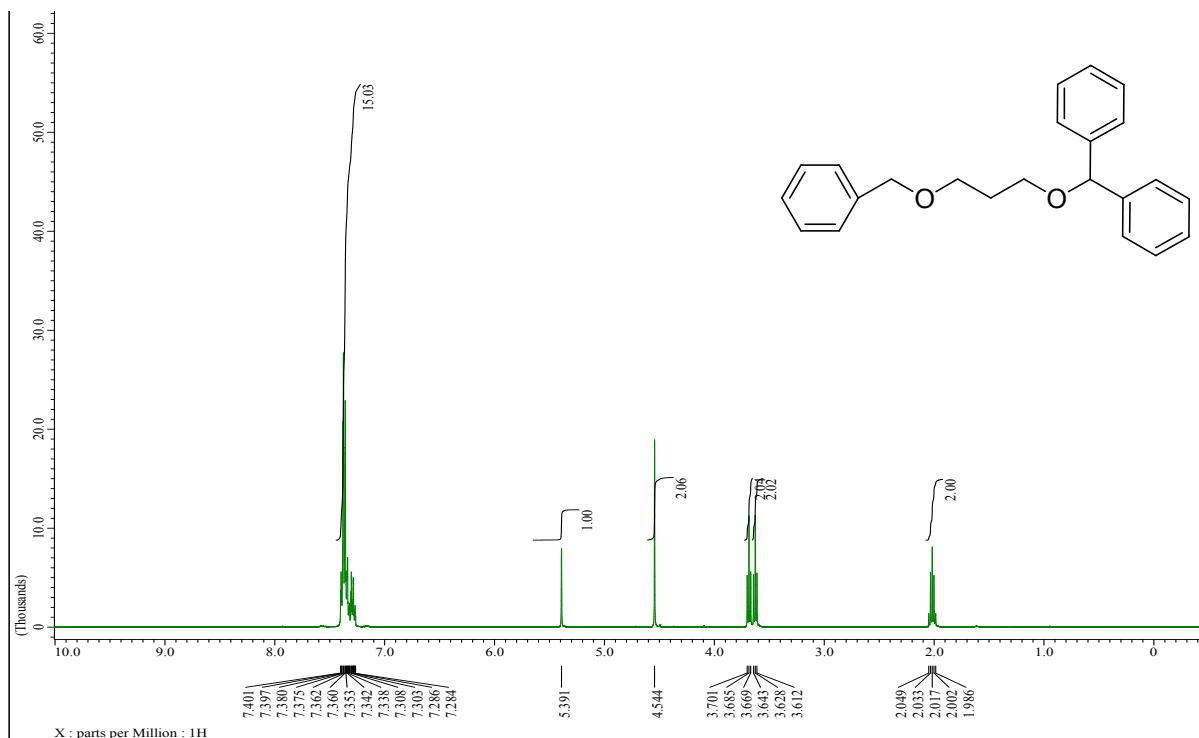

### <sup>1</sup>H NMR spectrum of ((3-(benzyloxy)propoxy)methylene)dibenzene (4n)

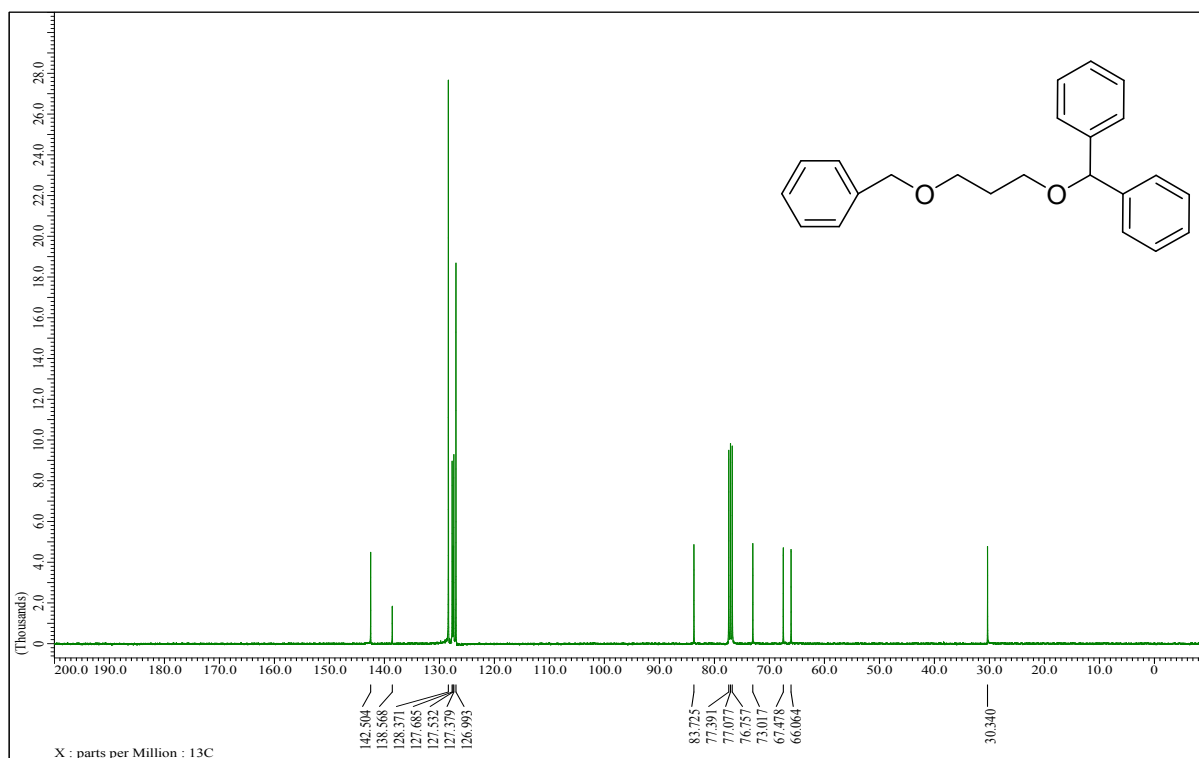

### <sup>13</sup>C NMR spectrum of ((3-(benzyloxy)propoxy)methylene)dibenzene (4n)

**(Phenoxymethylene)dibenzene (4o)**

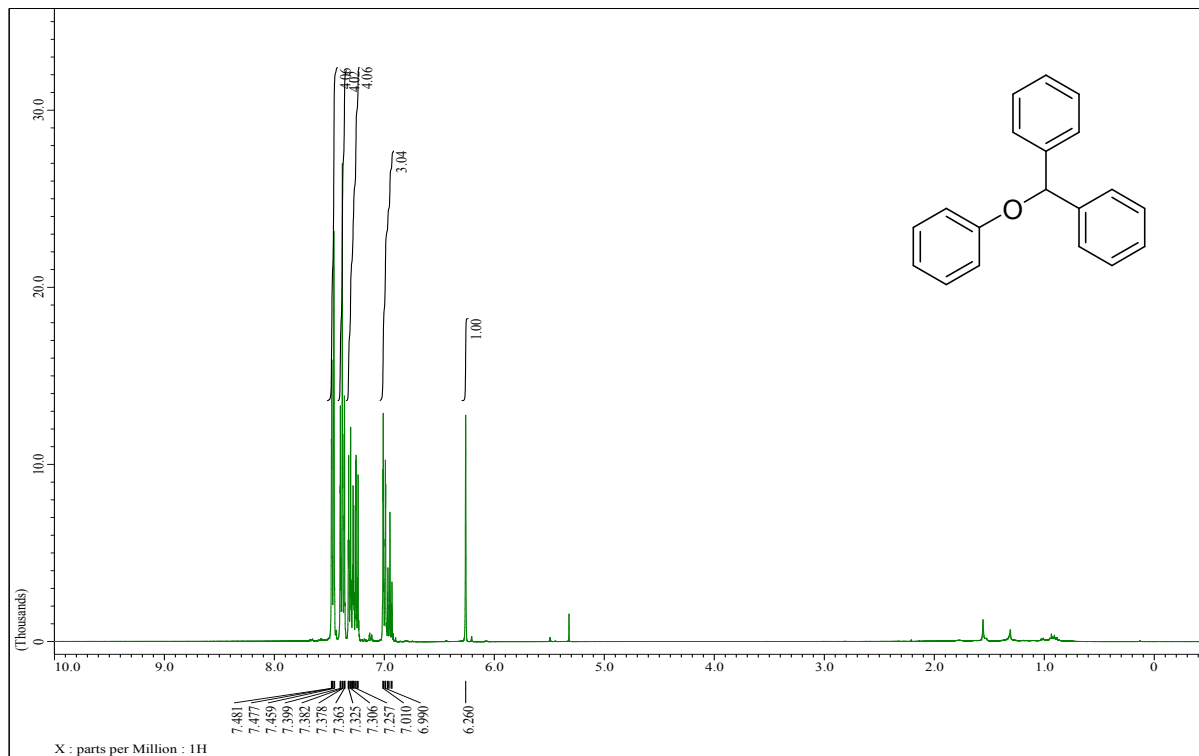

**<sup>1</sup>H NMR spectrum of (Phenoxymethylene)dibenzene (4o)**

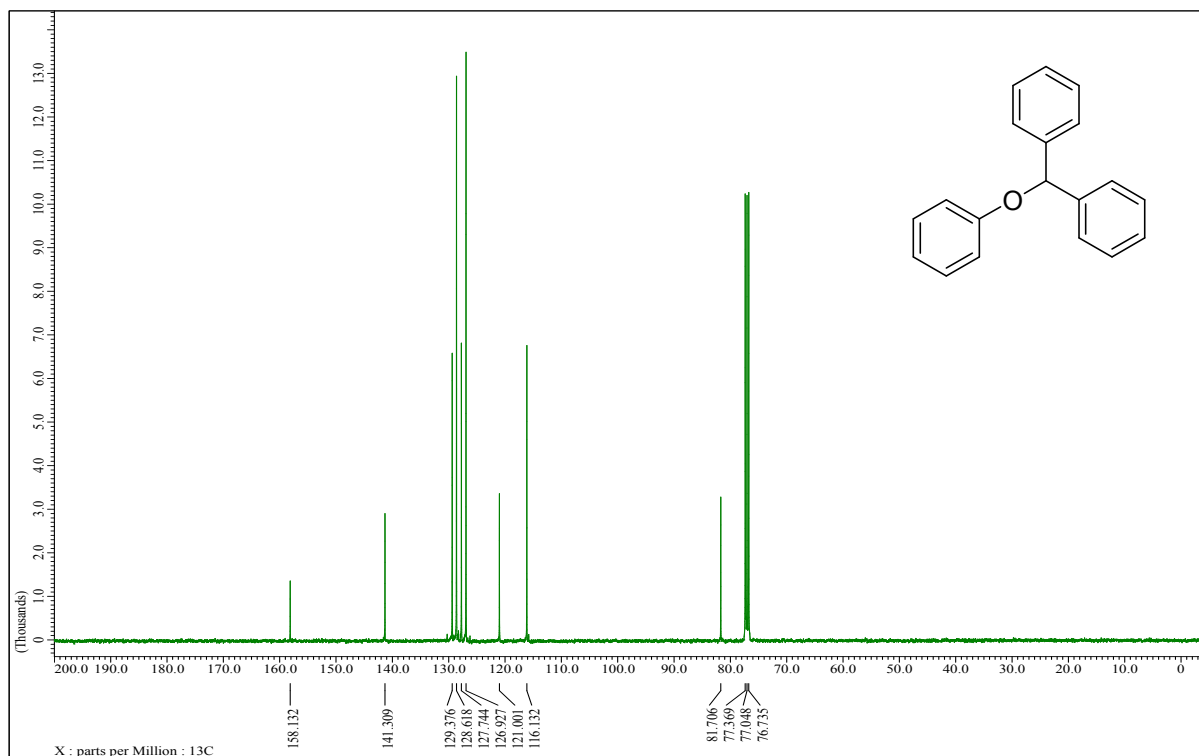

**<sup>13</sup>C NMR spectrum of (Phenoxymethylene)dibenzene (4o)**

### 1-(benzhydryloxy)-4-methoxybenzene (4p)

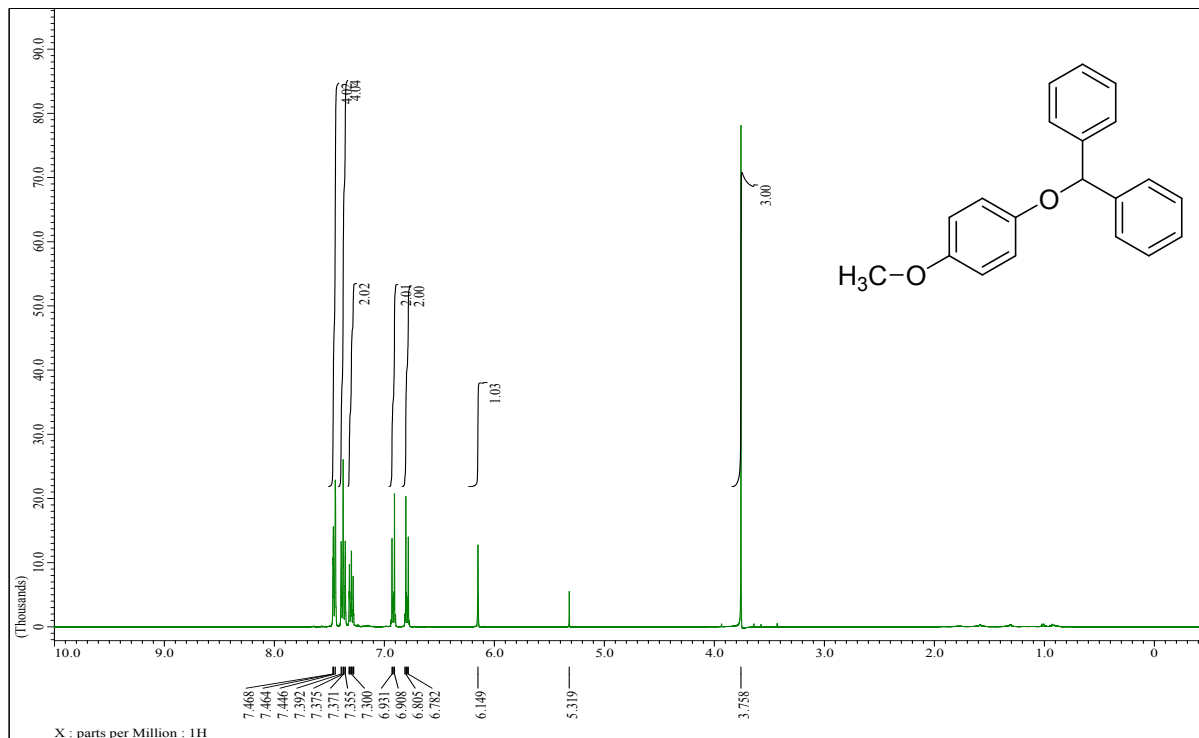

### <sup>1</sup>H NMR spectrum of 1-(benzhydryloxy)-4-methoxybenzene (4p)

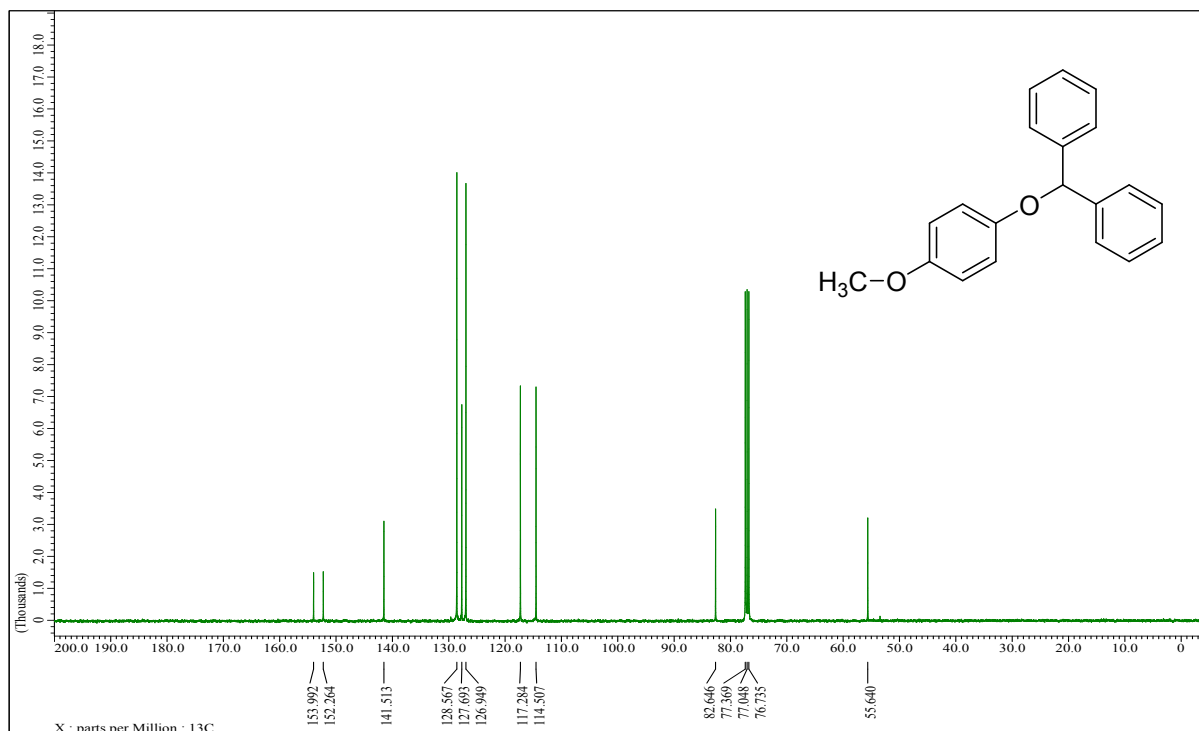

### <sup>13</sup>C NMR spectrum of 1-(benzhydryloxy)-4-methoxybenzene (4p)

### 1-(benzhydryloxy)-4-chlorobenzene (4q)

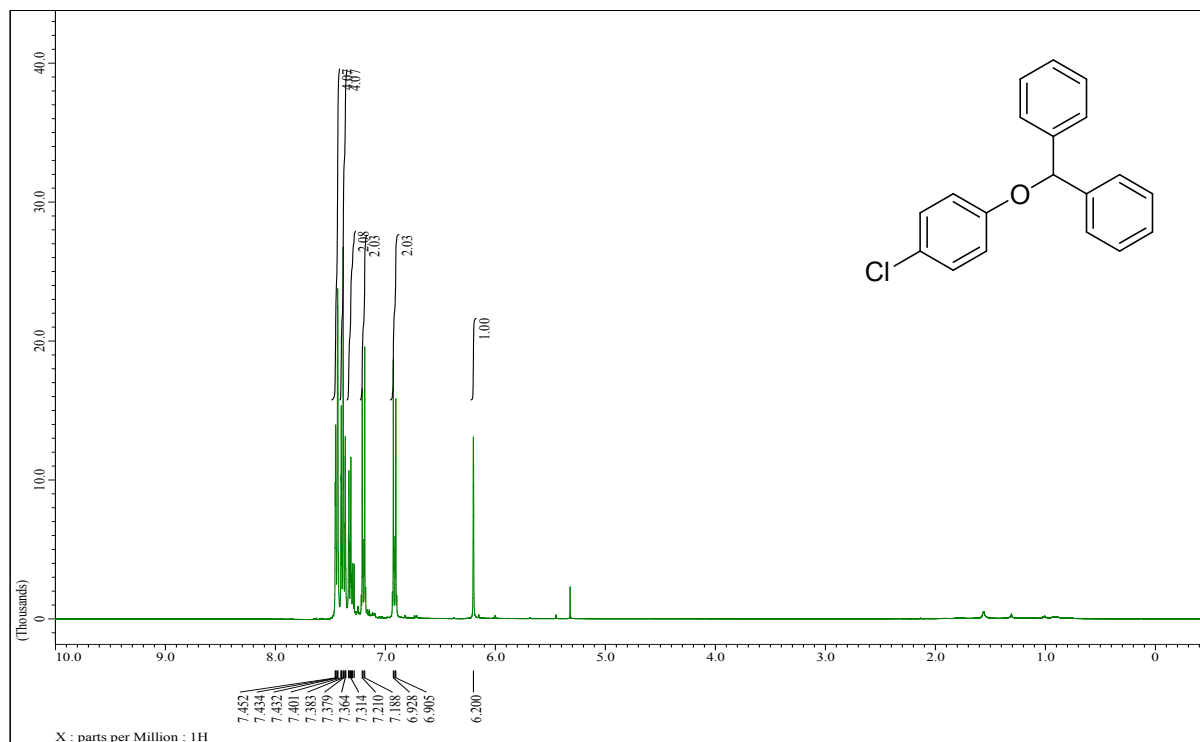

### <sup>1</sup>H NMR spectrum of 1-(benzhydryloxy)-4-chlorobenzene (4q)

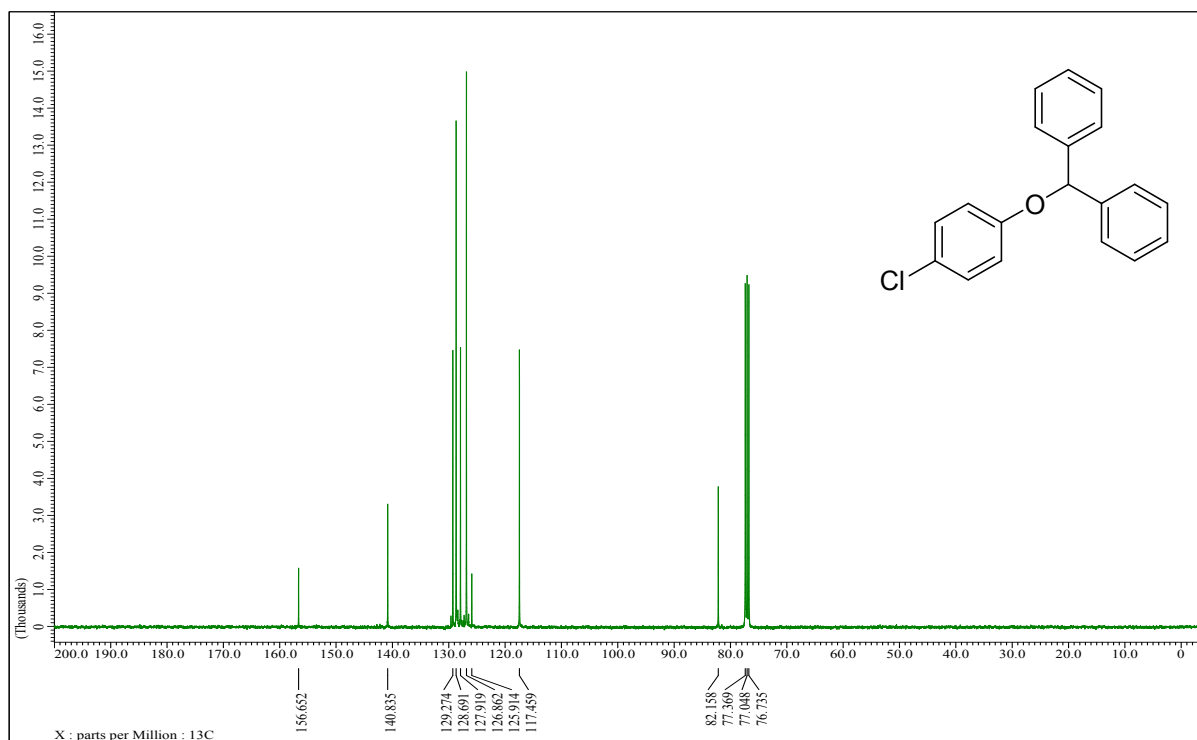

### <sup>13</sup>C NMR spectrum of 1-(benzhydryloxy)-4-chlorobenzene (4q)

## 1-(benzhydryloxy)-4-nitrobenzene (4r)

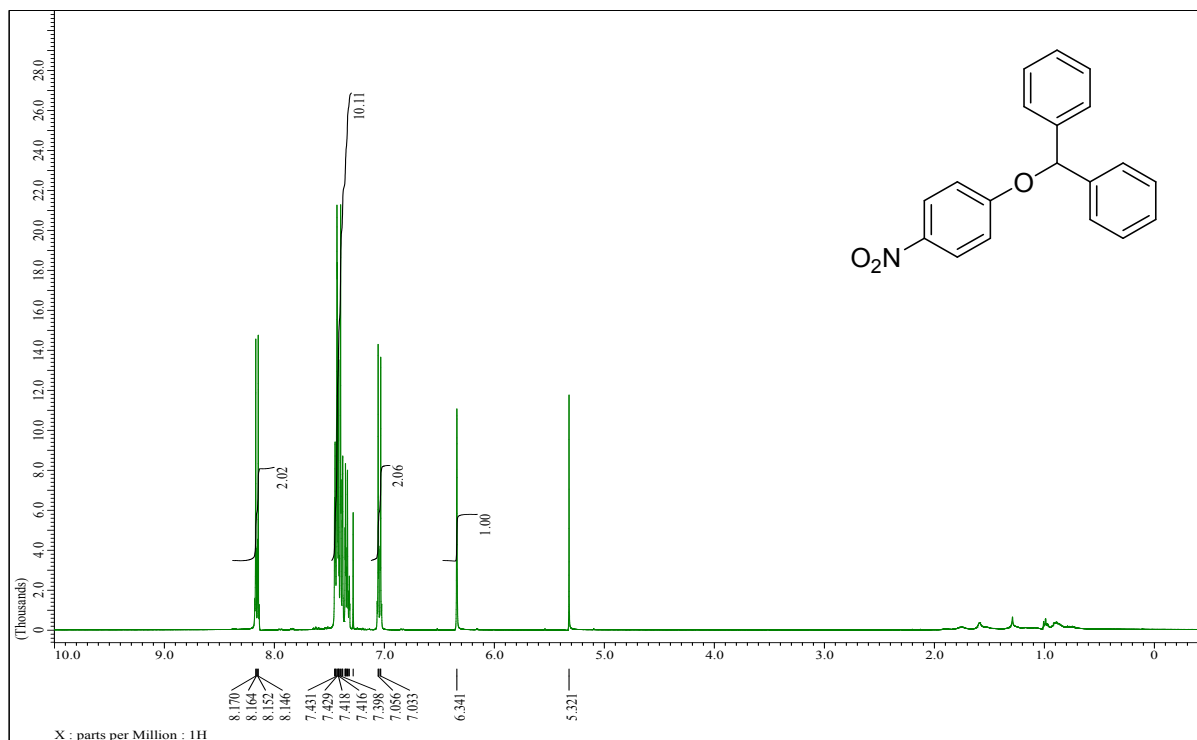

## <sup>1</sup>H NMR spectrum of 1-(benzhydryloxy)-4-nitrobenzene (4r)

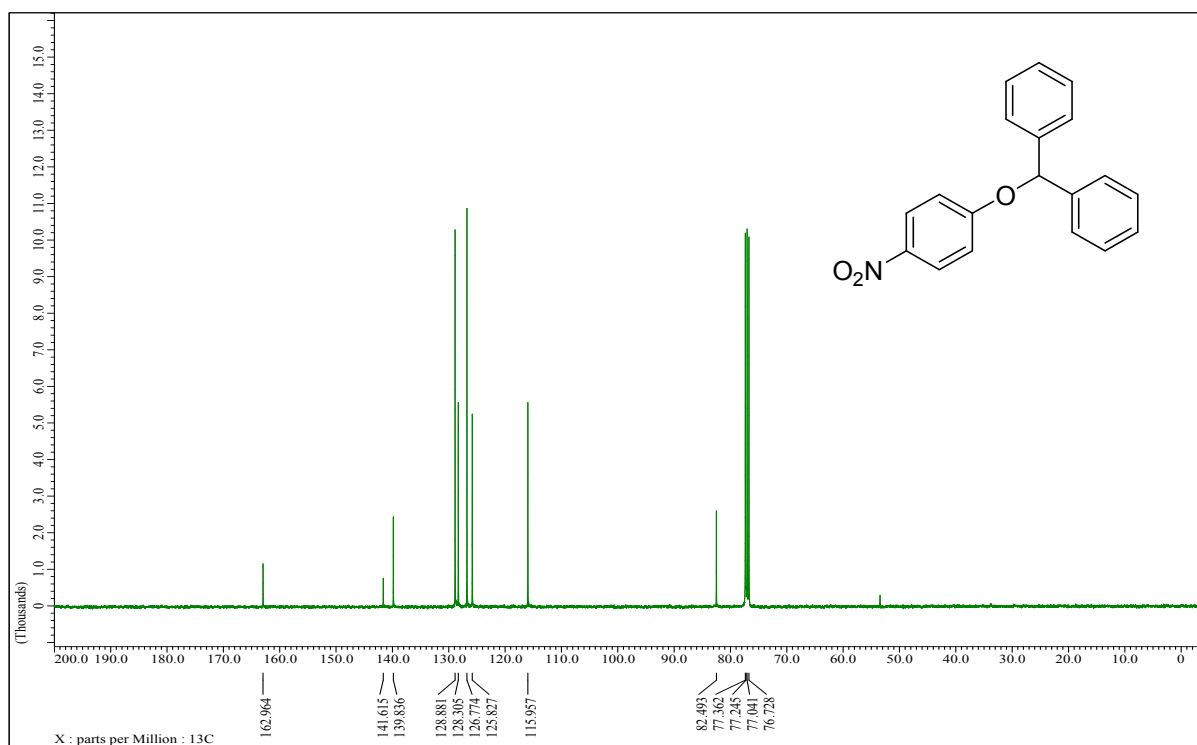

## <sup>13</sup>C NMR spectrum of 1-(benzhydryloxy)-4-nitrobenzene (4r)

### Benzyl 5-(benzhydryloxy)pentylcarbamate (4s)

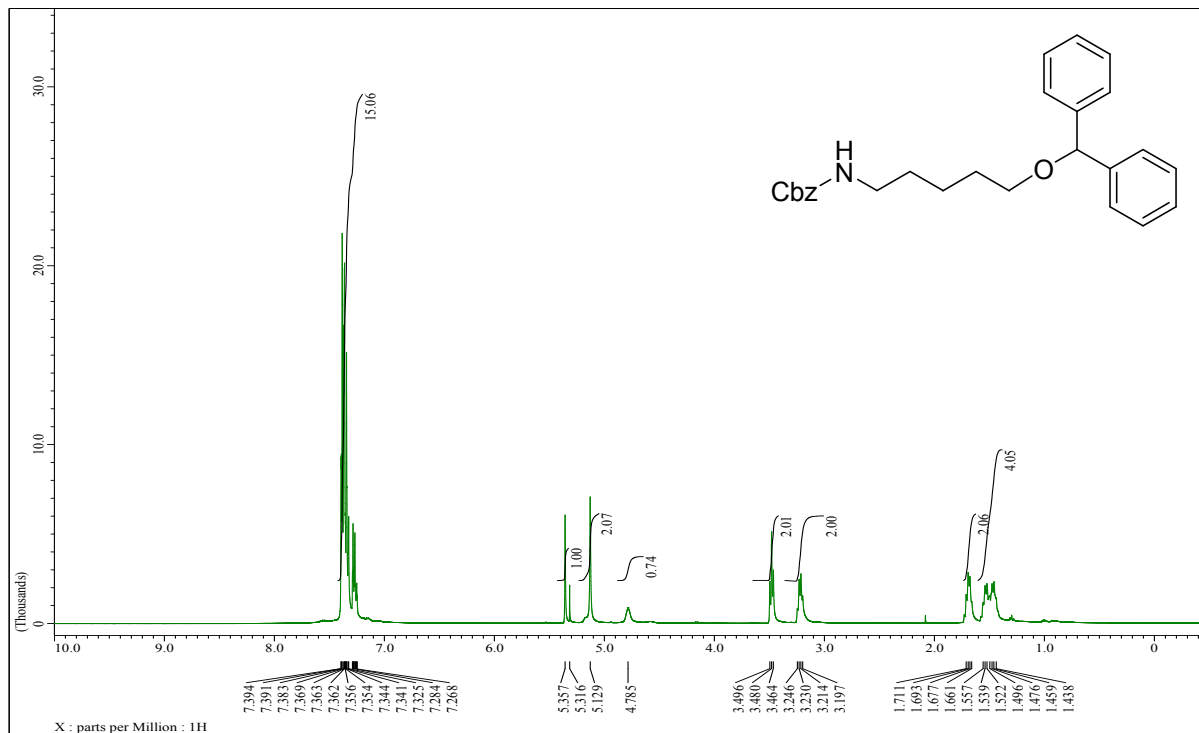

### <sup>1</sup>H NMR spectrum of Benzyl 5-(benzhydryloxy)pentylcarbamate (4s)

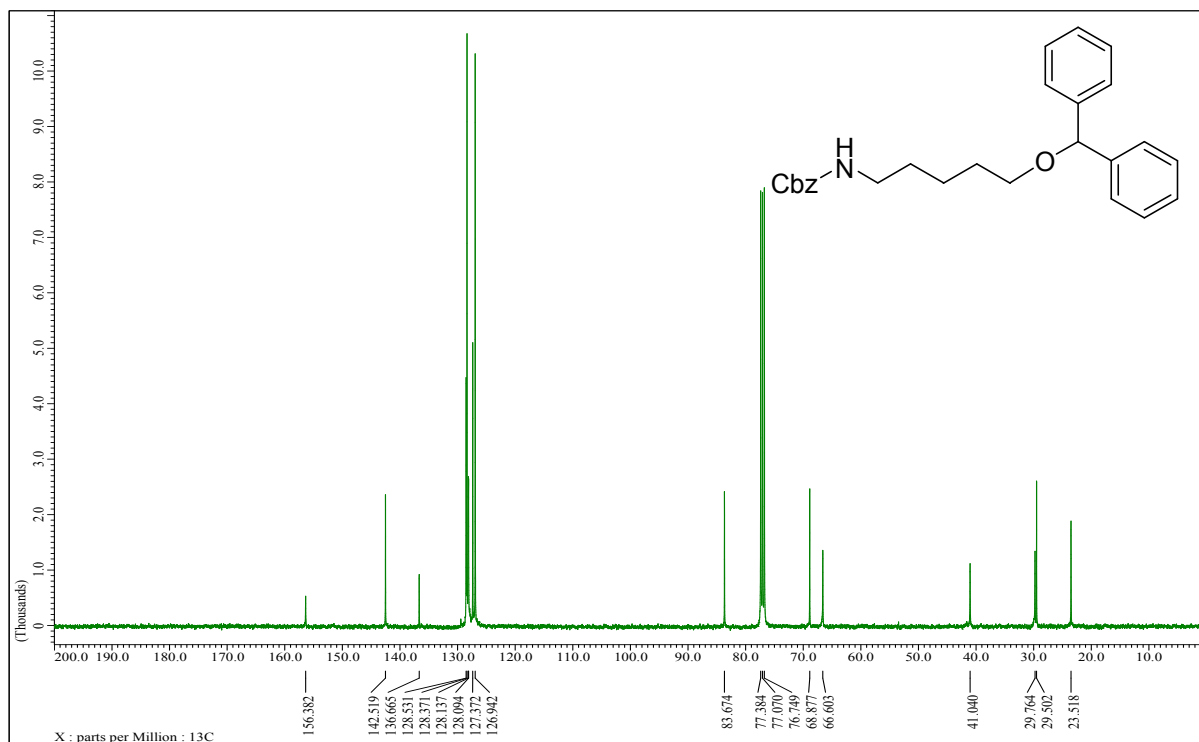

### <sup>13</sup>C NMR spectrum of Benzyl 5-(benzhydryloxy)pentylcarbamate (4s)

### 1-(butoxy(phenyl)methyl)-4-methylbenzene (6a)

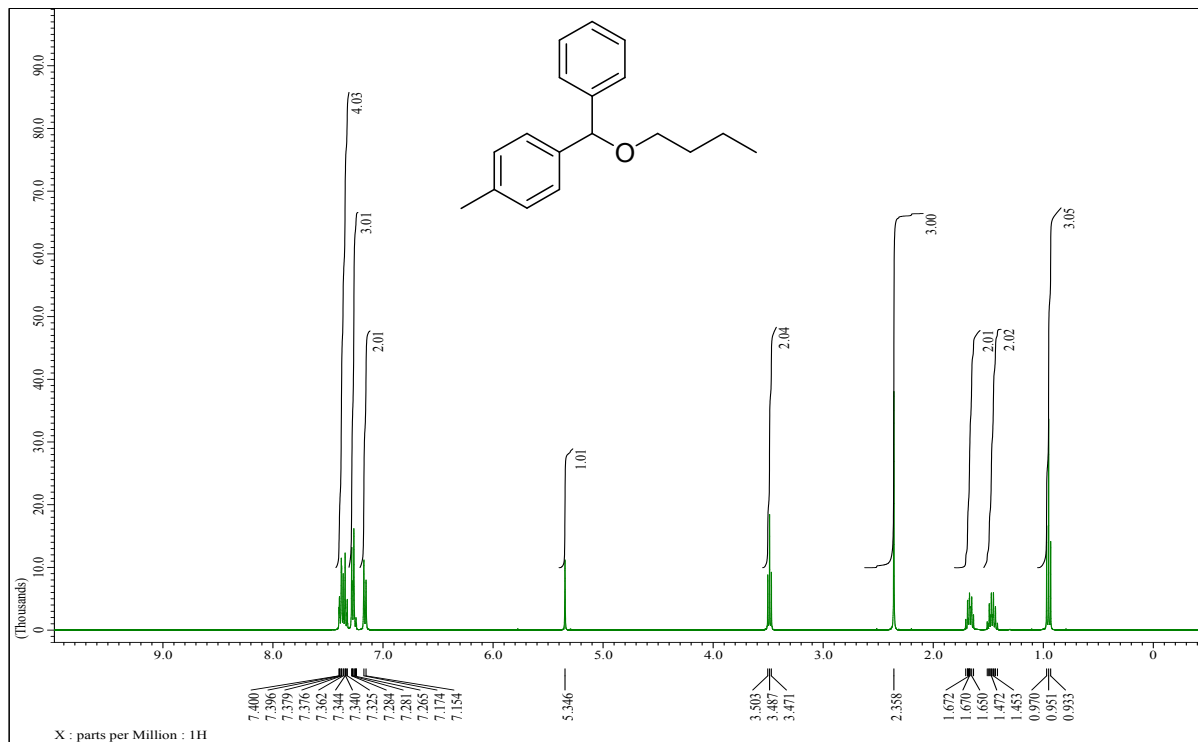

### <sup>1</sup>H NMR spectrum of 1-(butoxy(phenyl)methyl)-4-methylbenzene (6a)

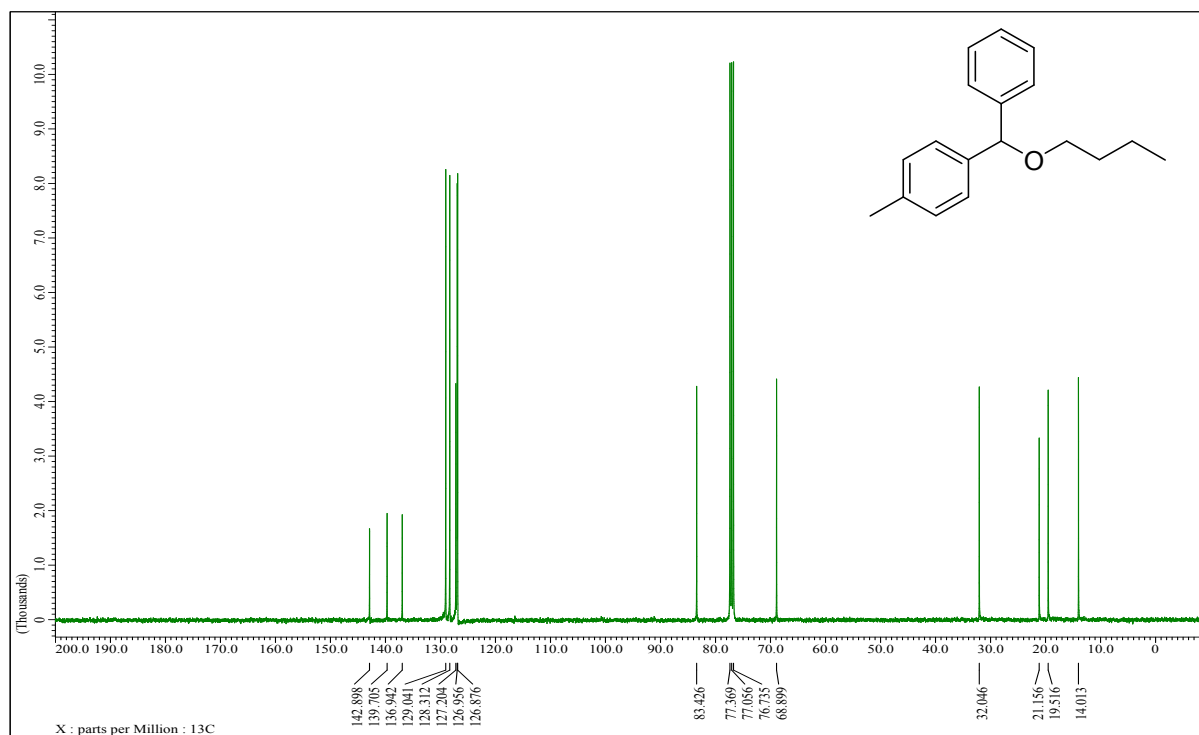

### <sup>13</sup>C NMR spectrum of 1-(butoxy(phenyl)methyl)-4-methylbenzene (6a)

### 1-(butoxy(phenyl)methyl)-4-chlorobenzene (6b)

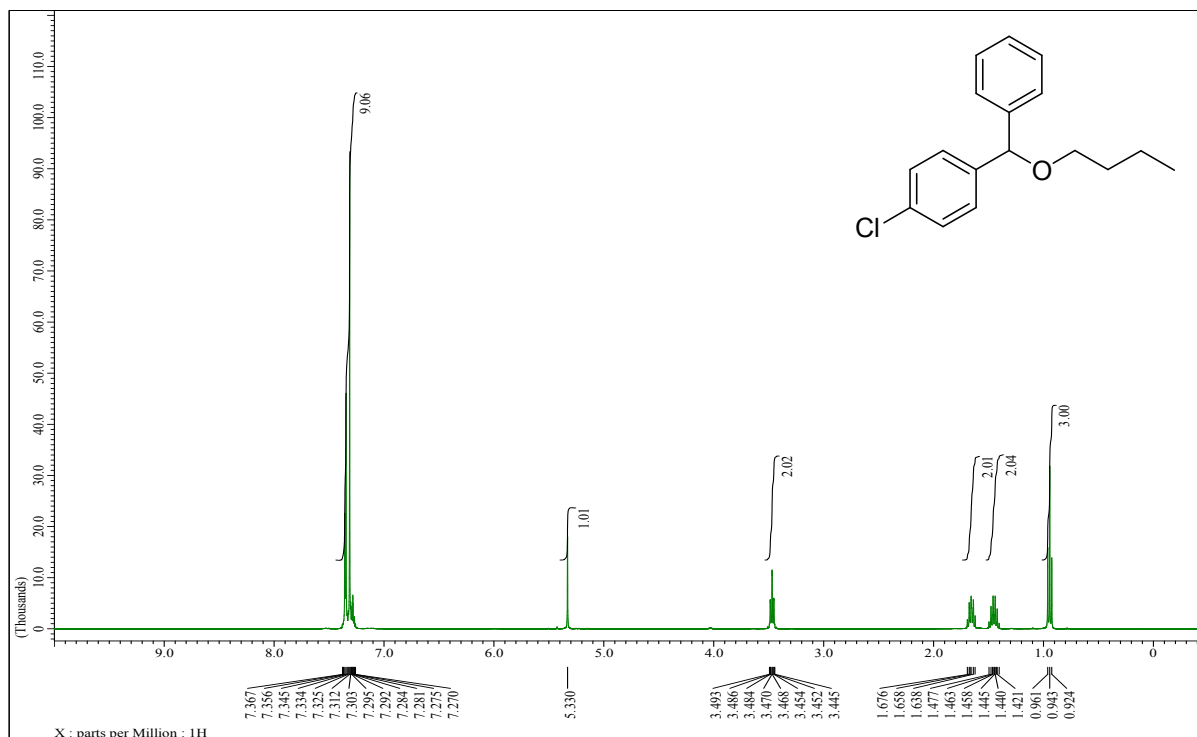

### <sup>1</sup>H NMR spectrum of 1-(butoxy(phenyl)methyl)-4-chlorobenzene (6b)

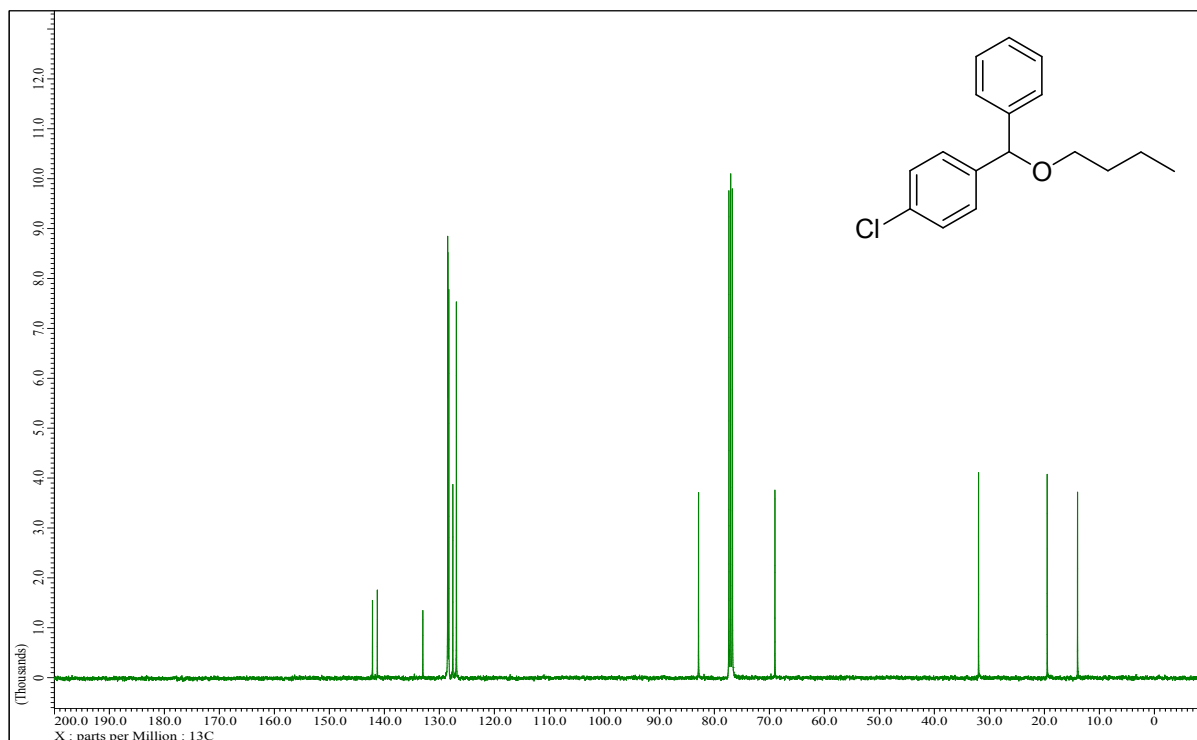

### <sup>13</sup>C NMR spectrum of 1-(butoxy(phenyl)methyl)-4-chlorobenzene (6b)



### 1-(butoxy(phenyl)methyl)-4-nitrobenzene (6c)

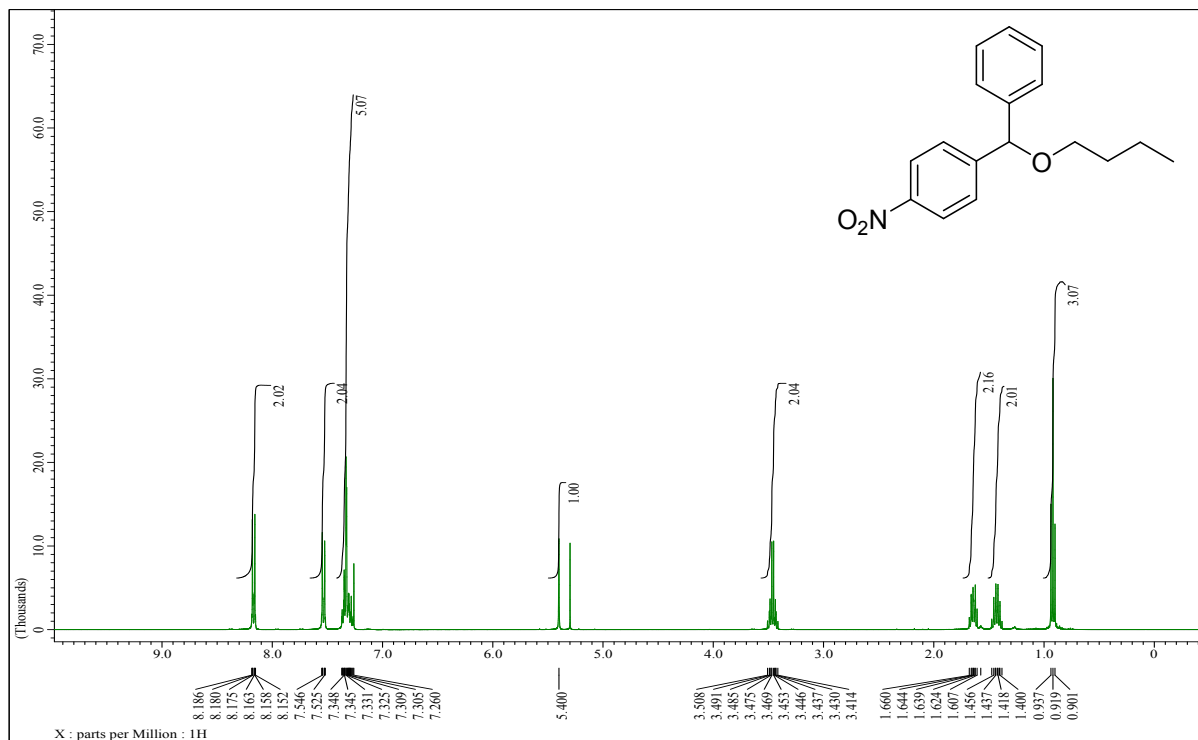

### <sup>1</sup>H NMR spectrum of 1-(butoxy(phenyl)methyl)-4-nitrobenzene (6c)

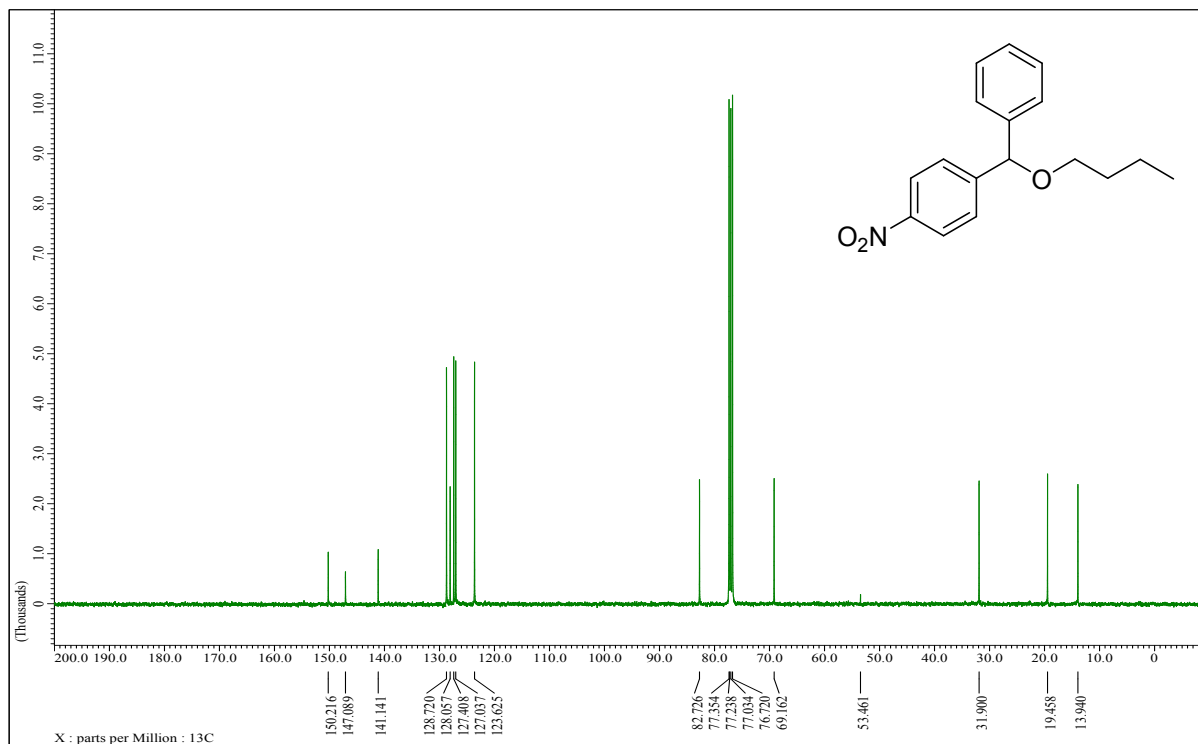

### <sup>13</sup>C NMR spectrum of 1-(butoxy(phenyl)methyl)-4-nitrobenzene (6c)

### 4,4'-(butoxymethylene)bis(methylbenzene) (6d)

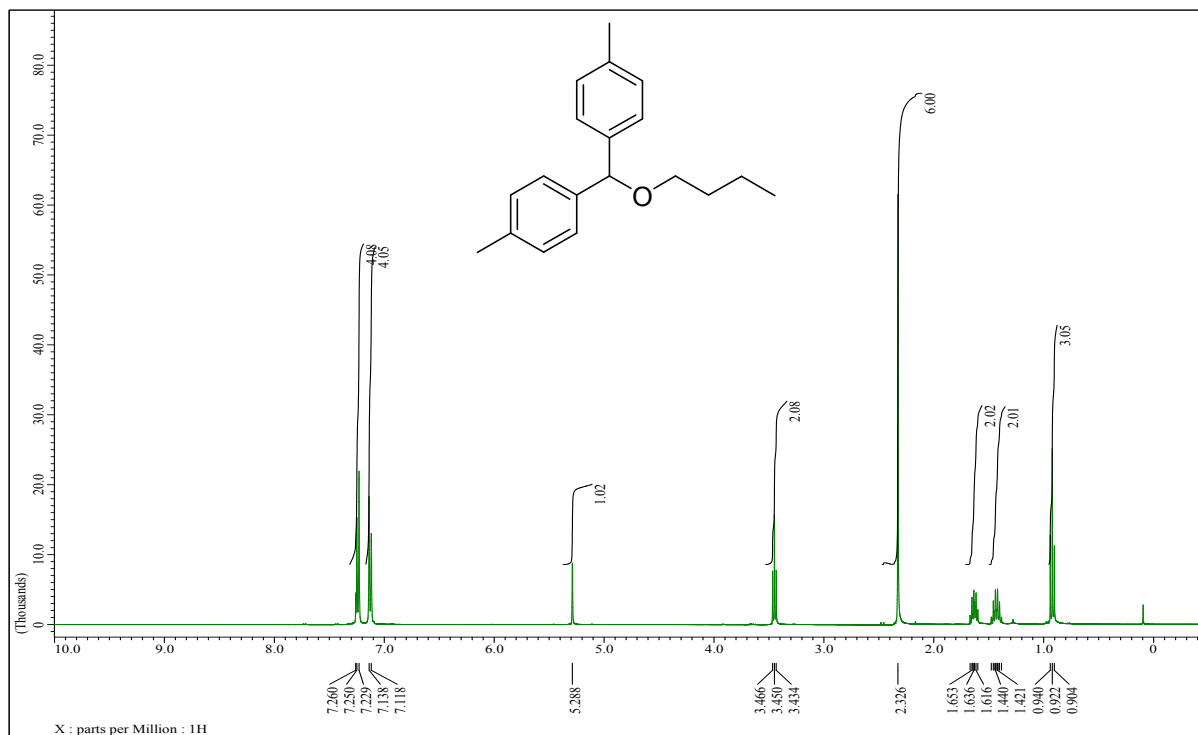

### <sup>1</sup>H NMR spectrum of 4,4'-(butoxymethylene)bis(methylbenzene) (6d)

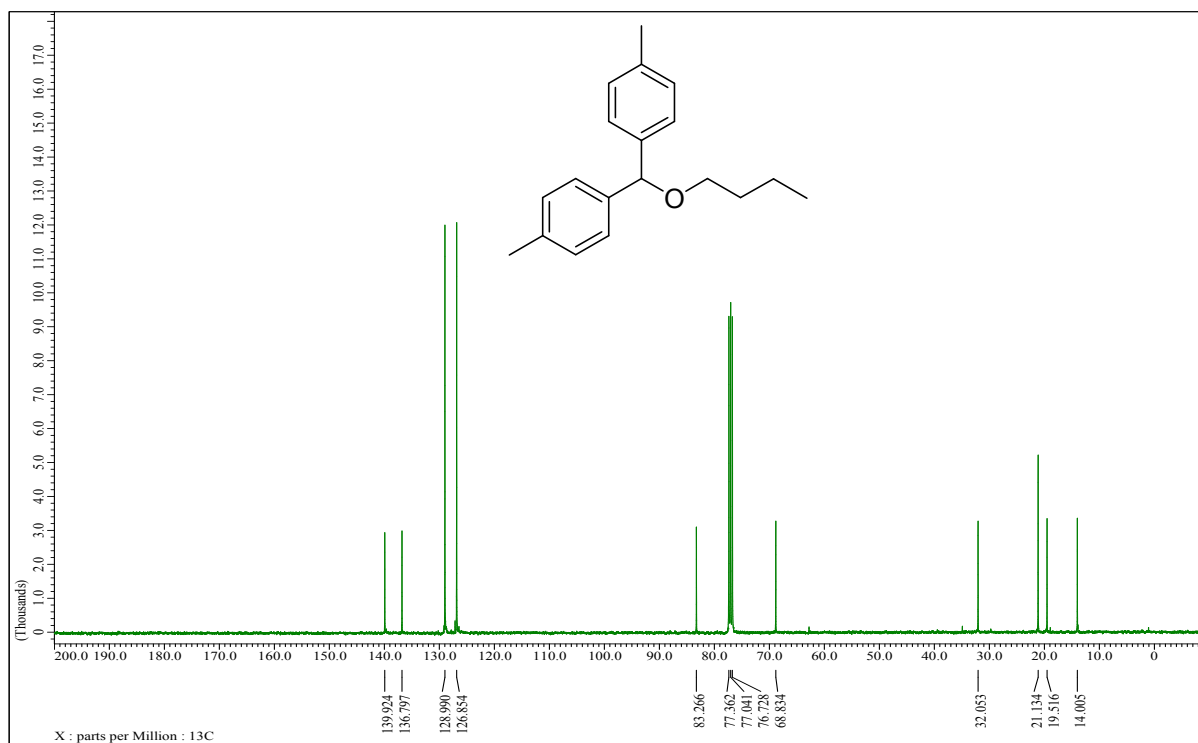

### <sup>13</sup>C NMR spectrum of 4,4'-(butoxymethylene)bis(methylbenzene) (6d)

### 4,4'-(butoxymethylene)bis(fluorobenzene) (6e)

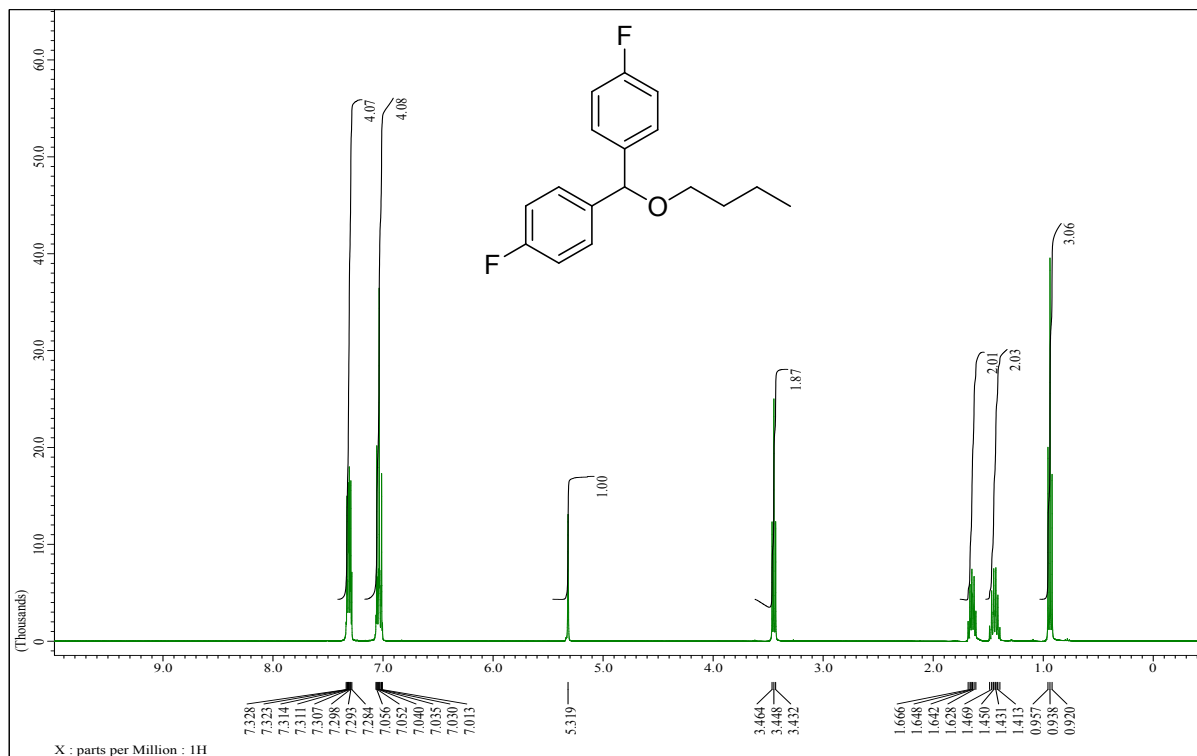

### <sup>1</sup>H NMR spectrum of 4,4'-(butoxymethylene)bis(fluorobenzene) (6e)

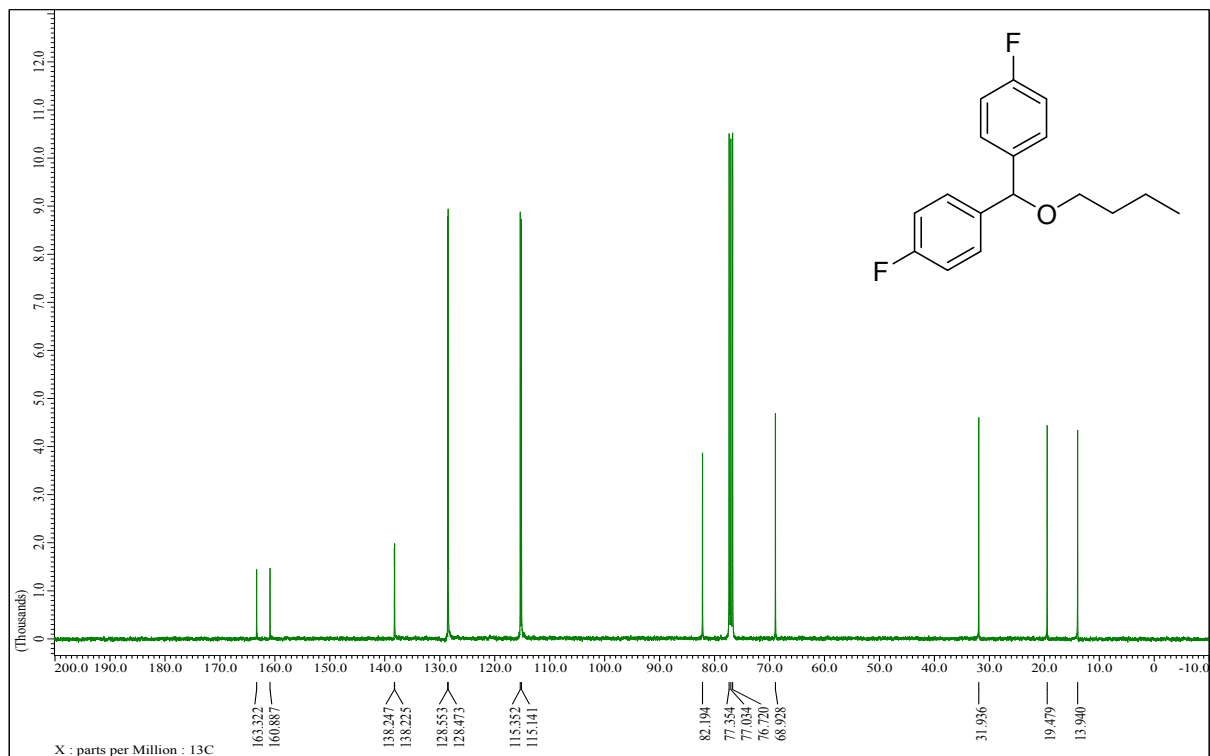

### <sup>13</sup>C NMR spectrum of 4,4'-(butoxymethylene)bis(fluorobenzene) (6e)

### 4,4'-(butoxymethylene)bis(chlorobenzene) (**6f**)

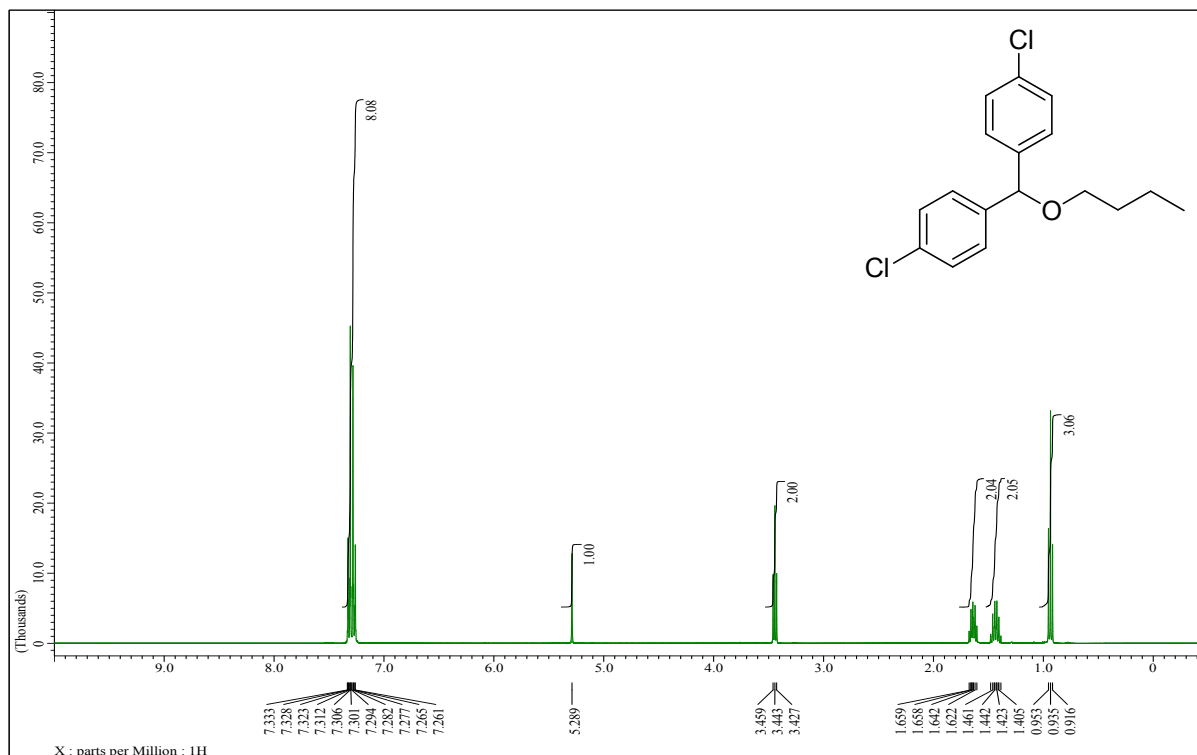

<sup>1</sup>H NMR spectrum of 4,4'-(butoxymethylene)bis(chlorobenzene) (**6f**)

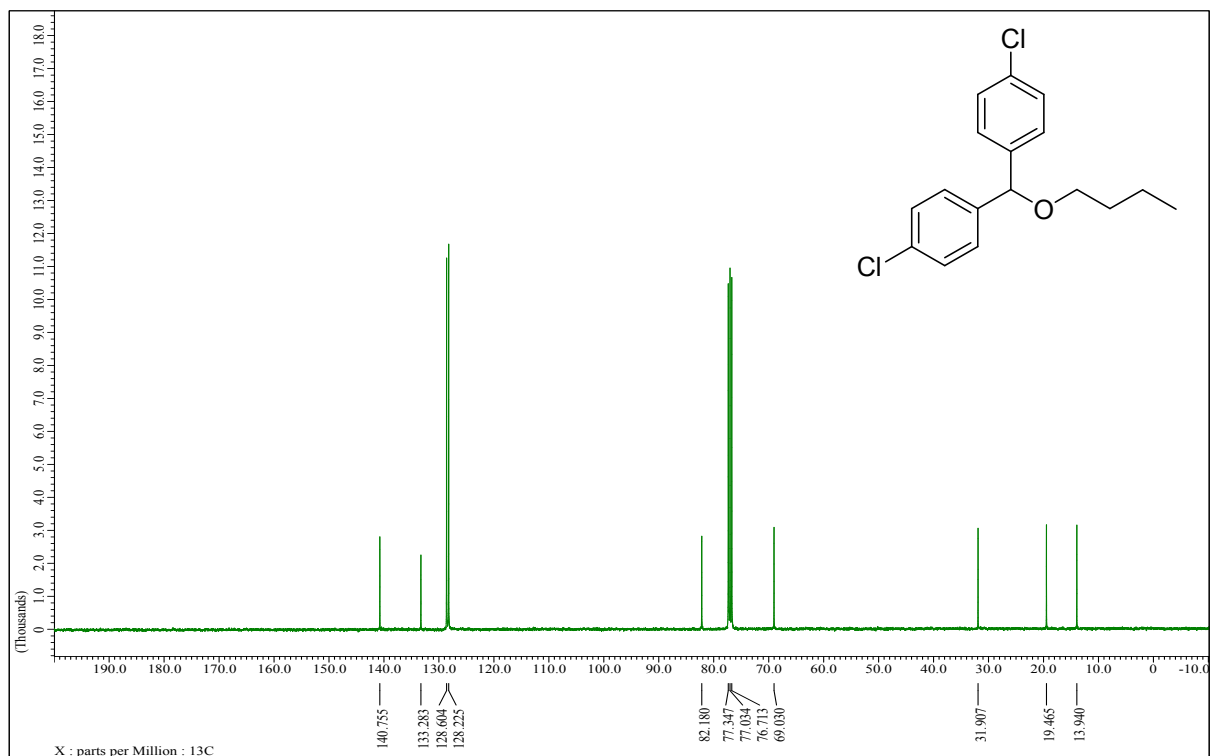

<sup>13</sup>C NMR spectrum of 4,4'-(butoxymethylene)bis(chlorobenzene) (**6f**)

### 1-(allyloxy(phenyl)methyl)-4-methylbenzene (6g)

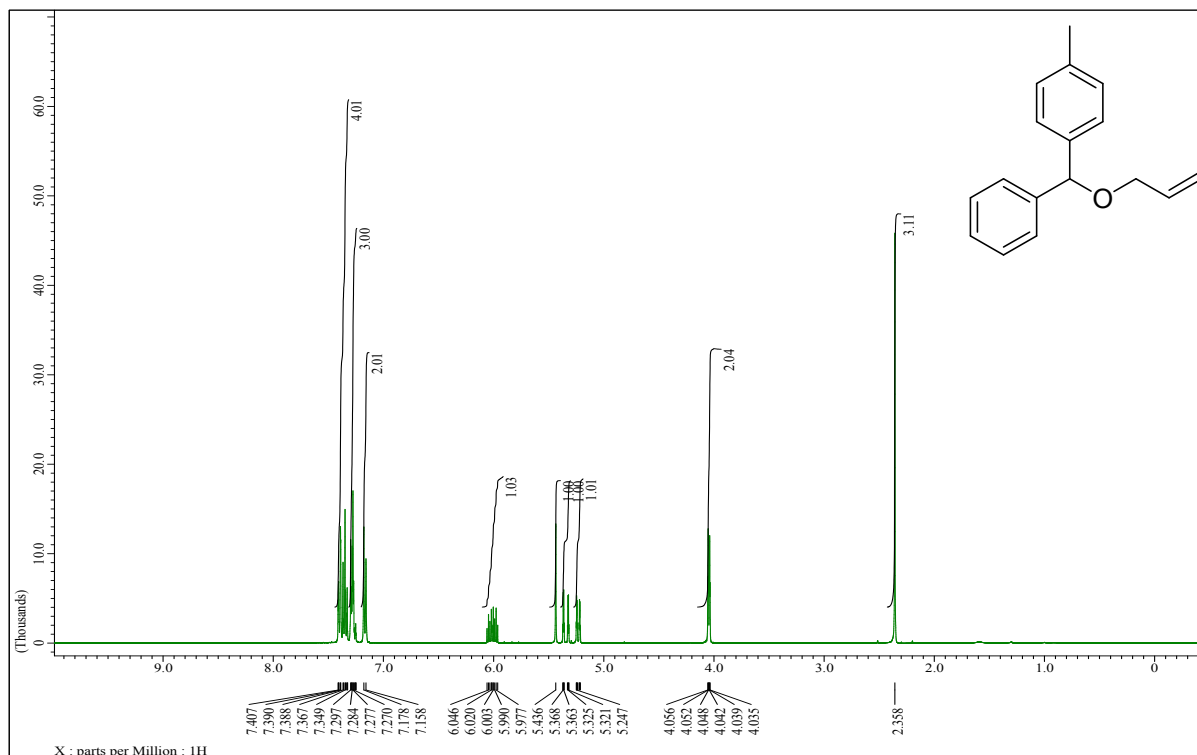

### <sup>1</sup>H NMR spectrum of 1-(allyloxy(phenyl)methyl)-4-methylbenzene (6g)

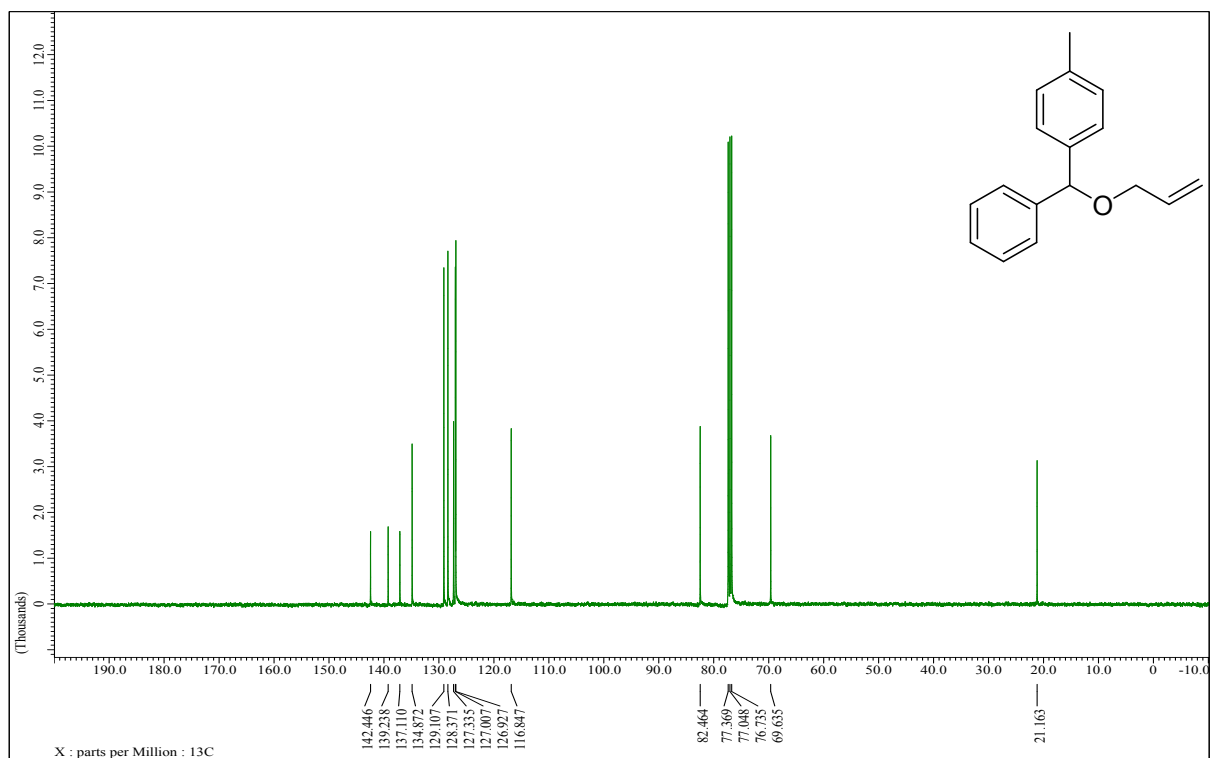

### <sup>13</sup>C NMR spectrum of 1-(allyloxy(phenyl)methyl)-4-methylbenzene (6g)

### 1-(allyloxy(phenyl)methyl)-4-chlorobenzene (6h)

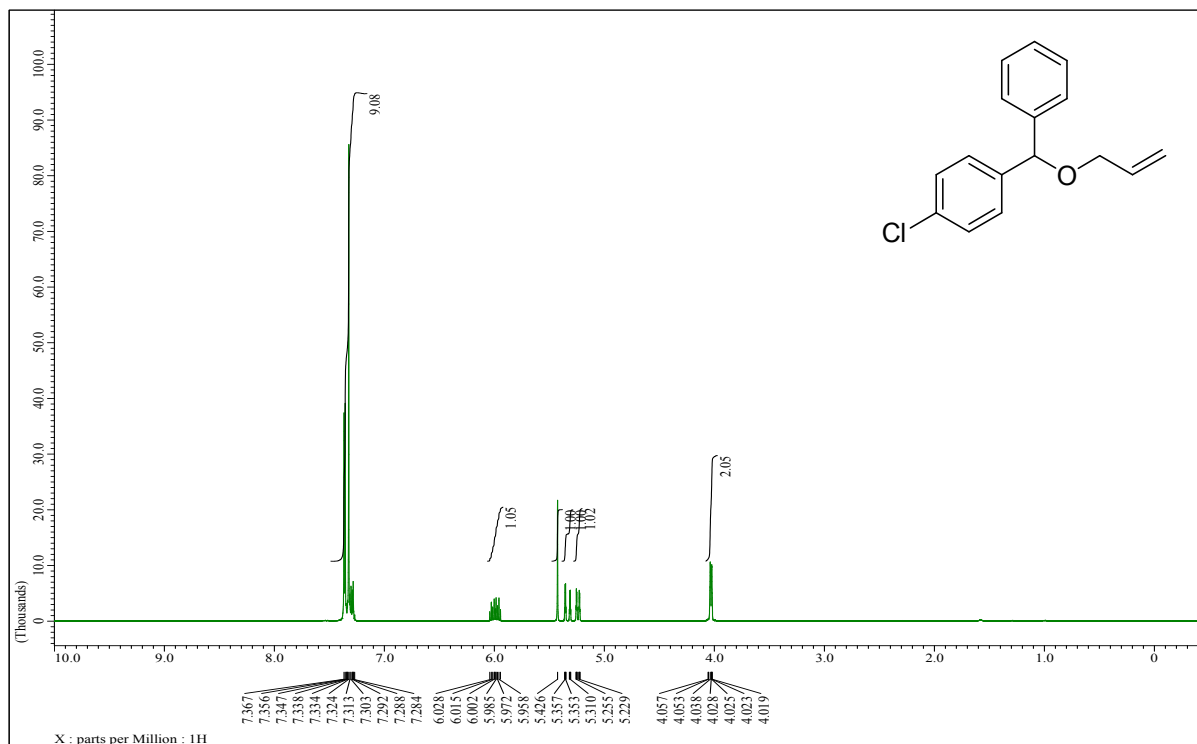

### <sup>1</sup>H NMR spectrum of 1-(allyloxy(phenyl)methyl)-4-chlorobenzene (6h)

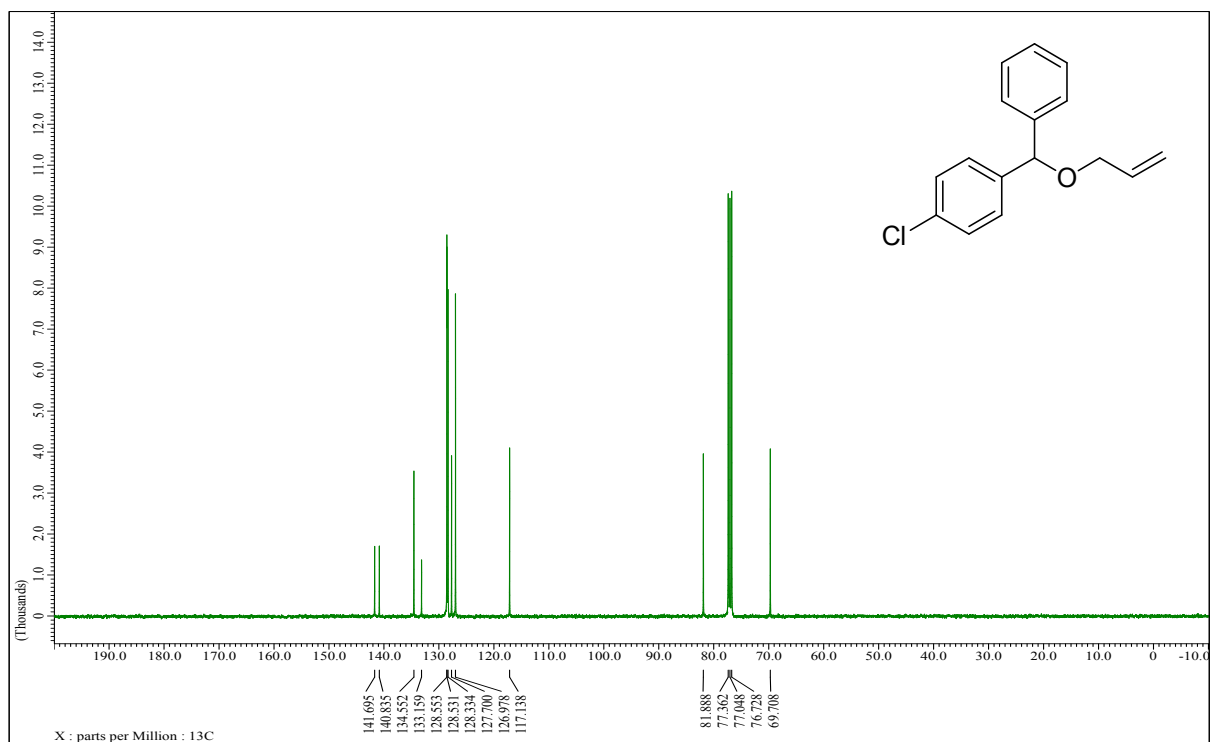

### <sup>13</sup>C NMR spectrum of 1-(allyloxy(phenyl)methyl)-4-chlorobenzene (6h)

### 1-(allyloxy(phenyl)methyl)-4-nitrobenzene (**6i**)

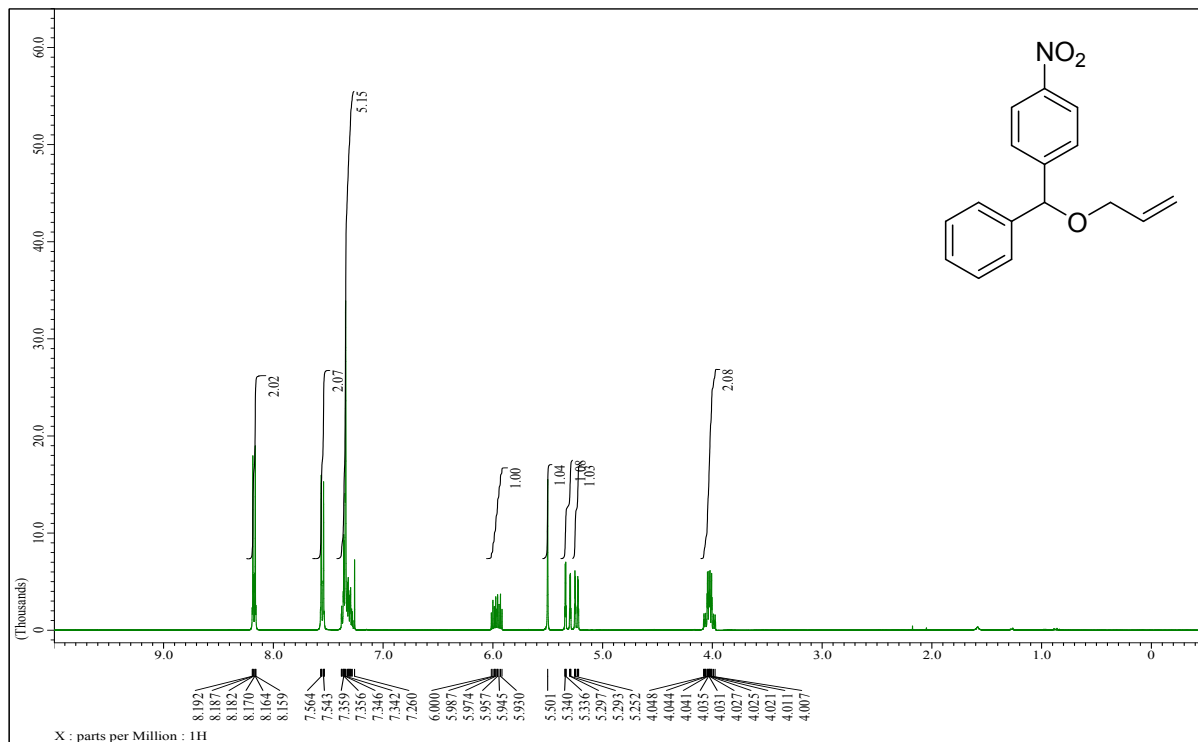

### <sup>1</sup>H NMR spectrum of 1-(allyloxy(phenyl)methyl)-4-nitrobenzene (**6i**)

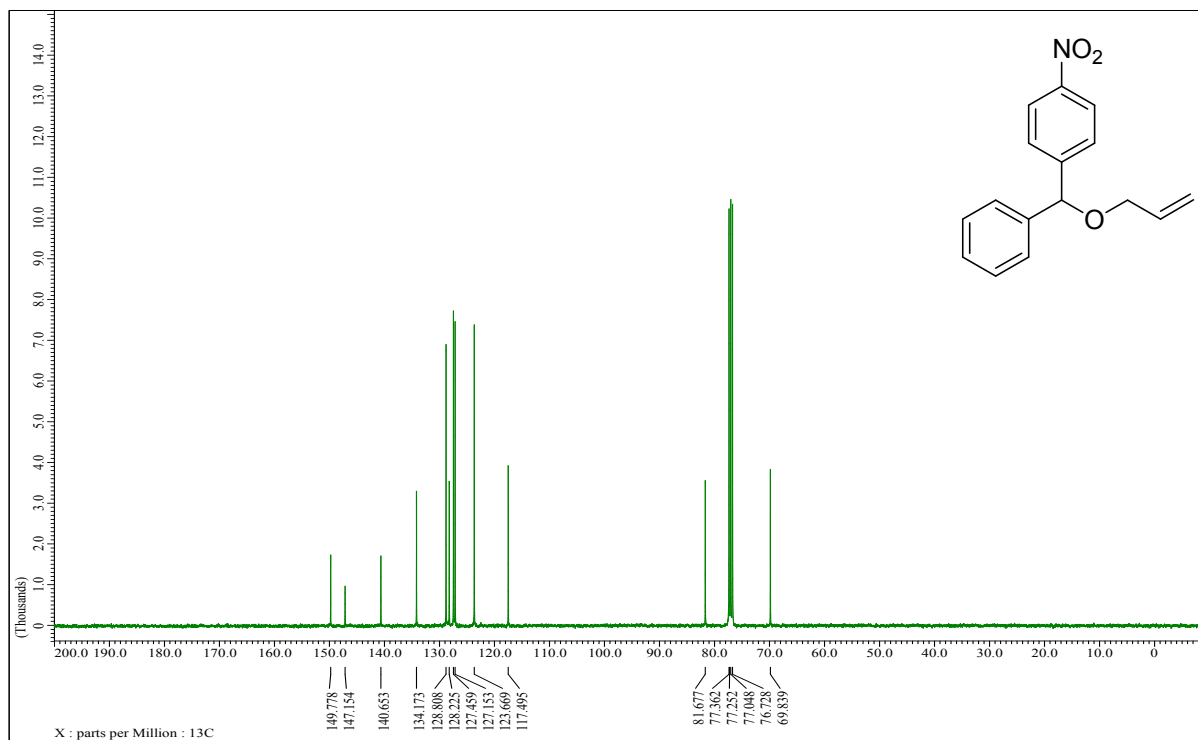

### <sup>13</sup>C NMR spectrum of 1-(allyloxy(phenyl)methyl)-4-nitrobenzene (**6i**)

### 4,4'-(allyloxymethylene)bis(methylbenzene) (6j)

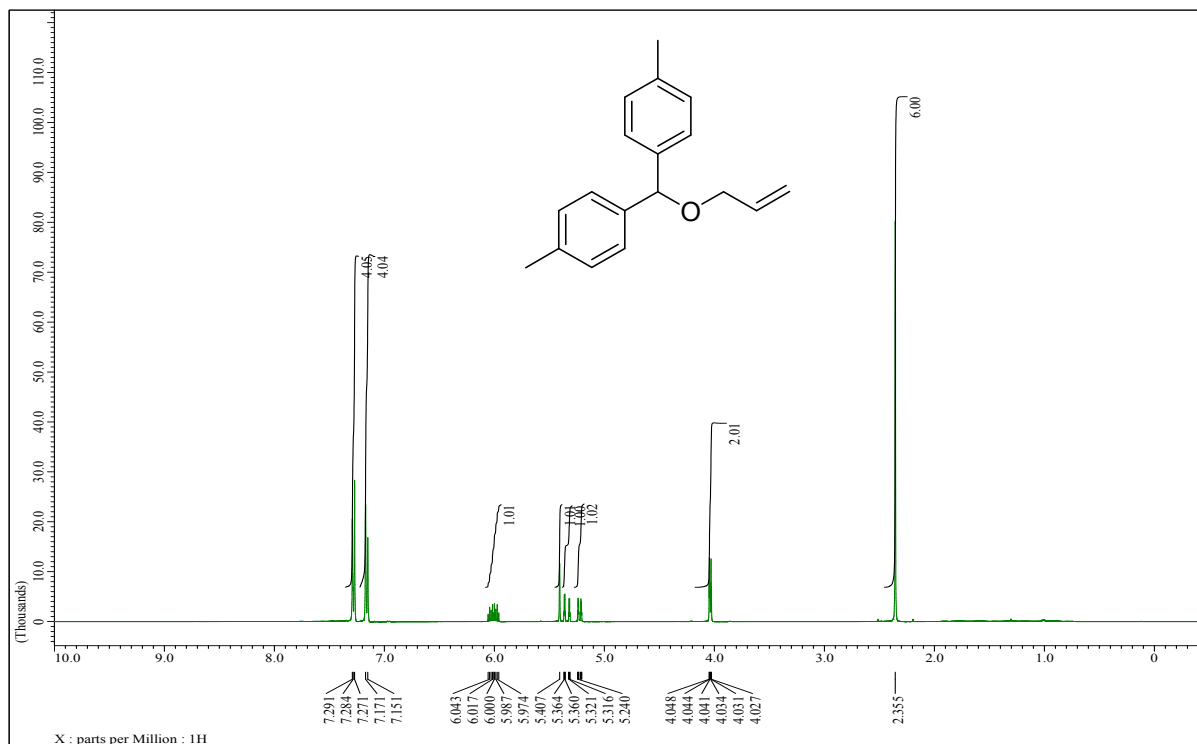

### <sup>1</sup>H NMR spectrum of 4,4'-(allyloxymethylene)bis(methylbenzene) (6j)

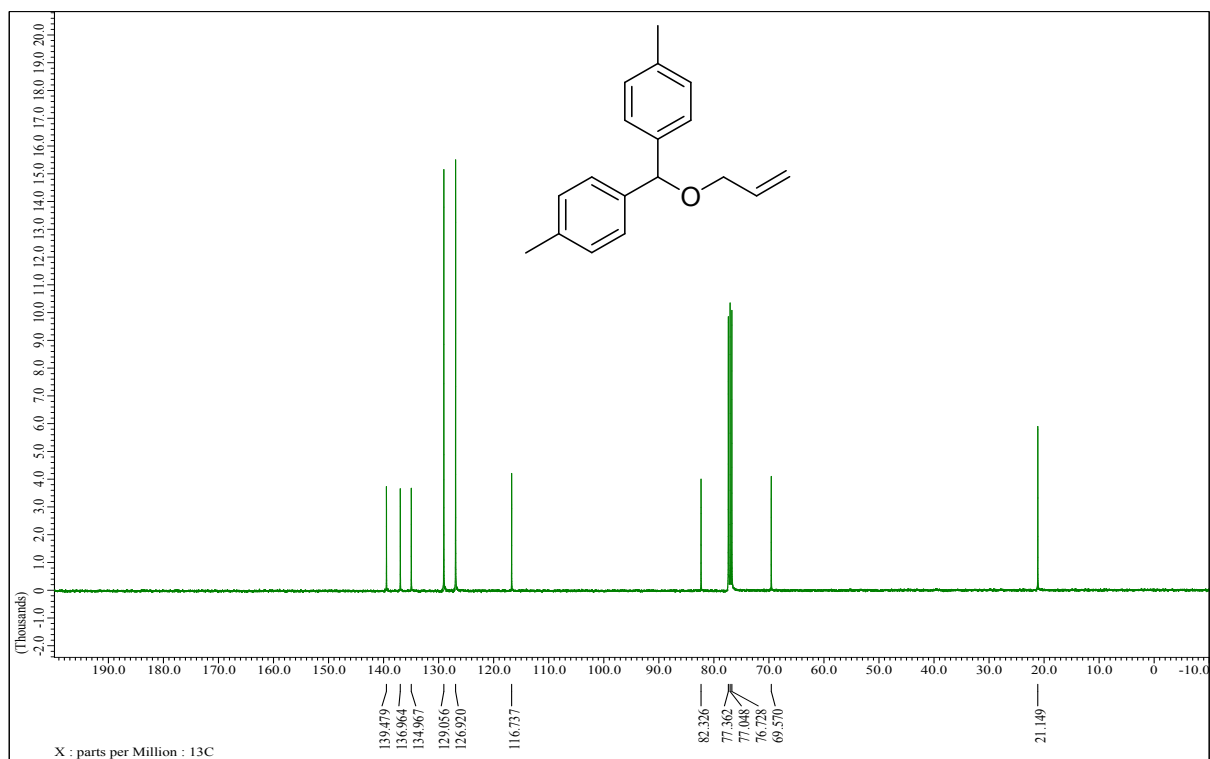

### <sup>13</sup>C NMR spectrum of 4,4'-(allyloxymethylene)bis(methylbenzene) (6j)



### 4,4'-(allyloxymethylene)bis(fluorobenzene) (**6k**)

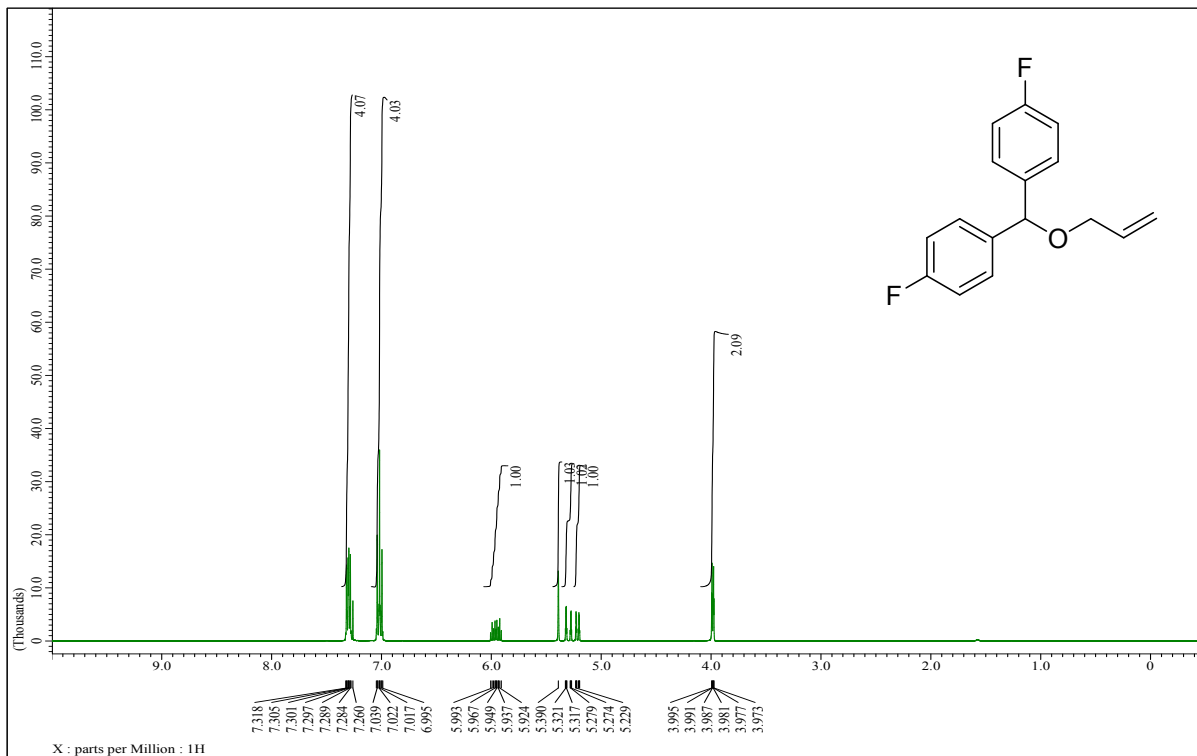

### <sup>1</sup>H NMR spectrum of 4,4'-(allyloxymethylene)bis(fluorobenzene) (**6k**)

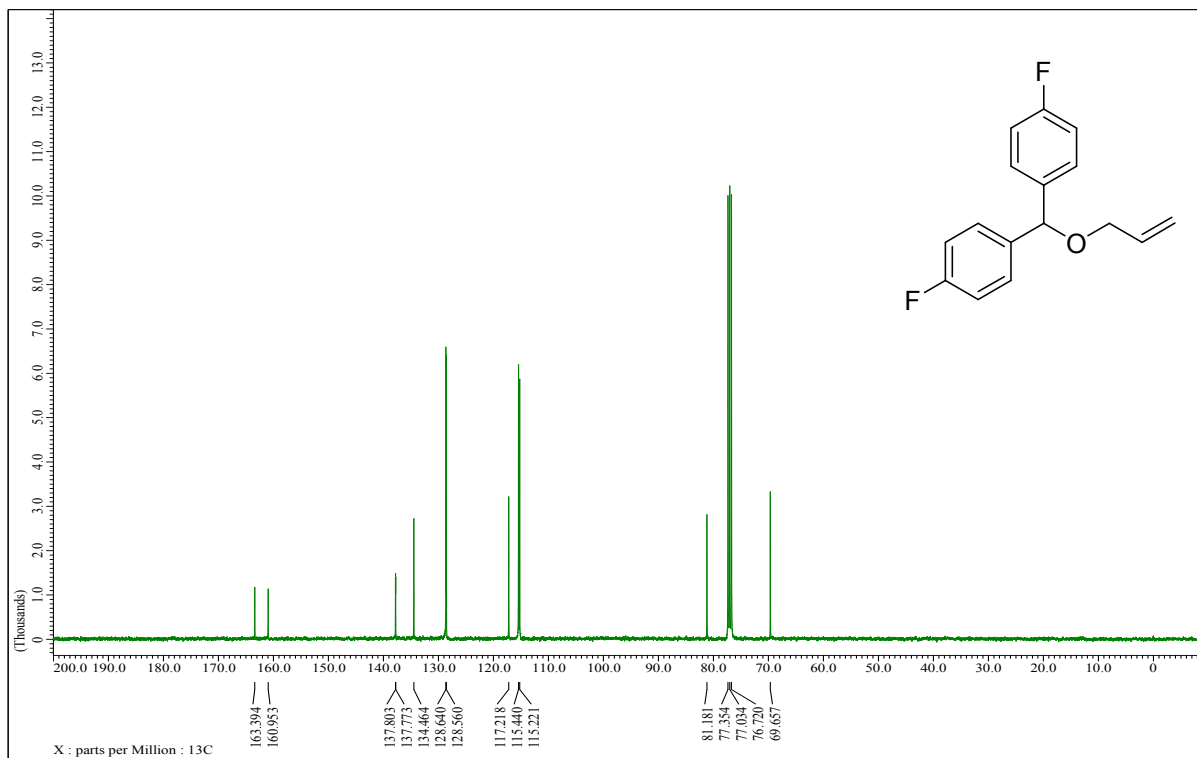

### <sup>13</sup>C NMR spectrum of 4,4'-(allyloxymethylene)bis(fluorobenzene) (**6k**)

### 4,4'-(allyloxymethylene)bis(chlorobenzene) (**6l**)

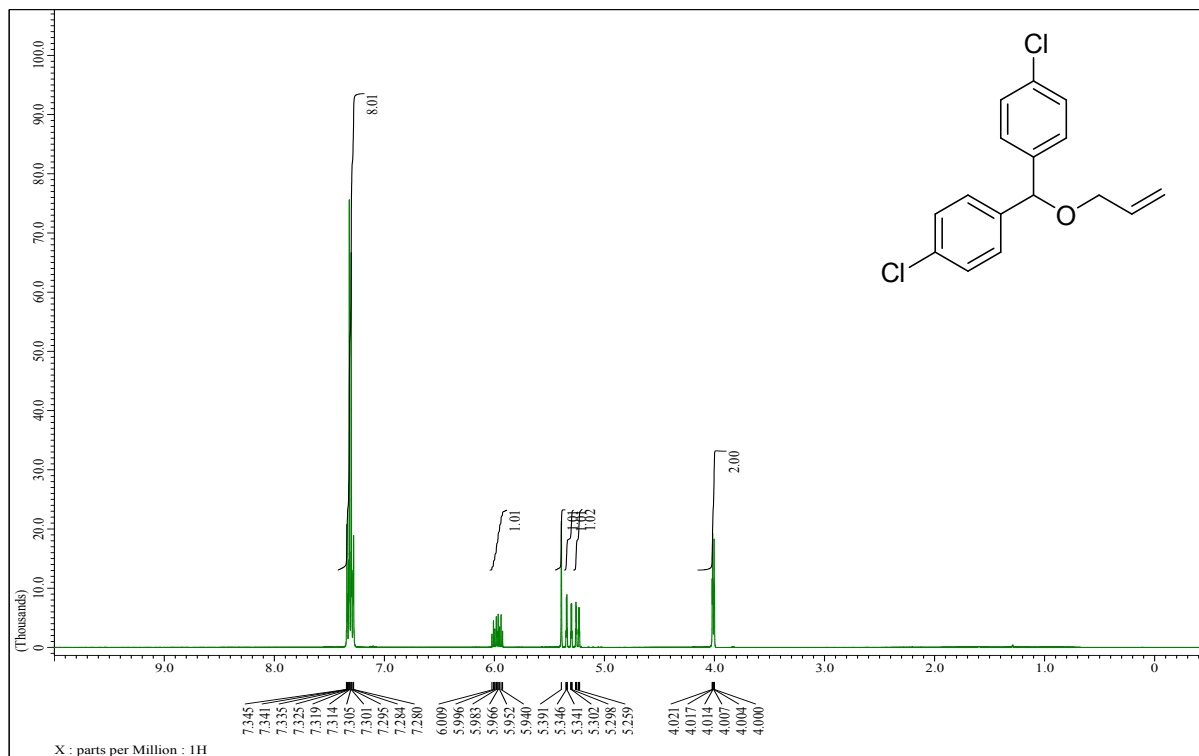

### <sup>1</sup>H NMR spectrum of 4,4'-(allyloxymethylene)bis(chlorobenzene) (**6l**)

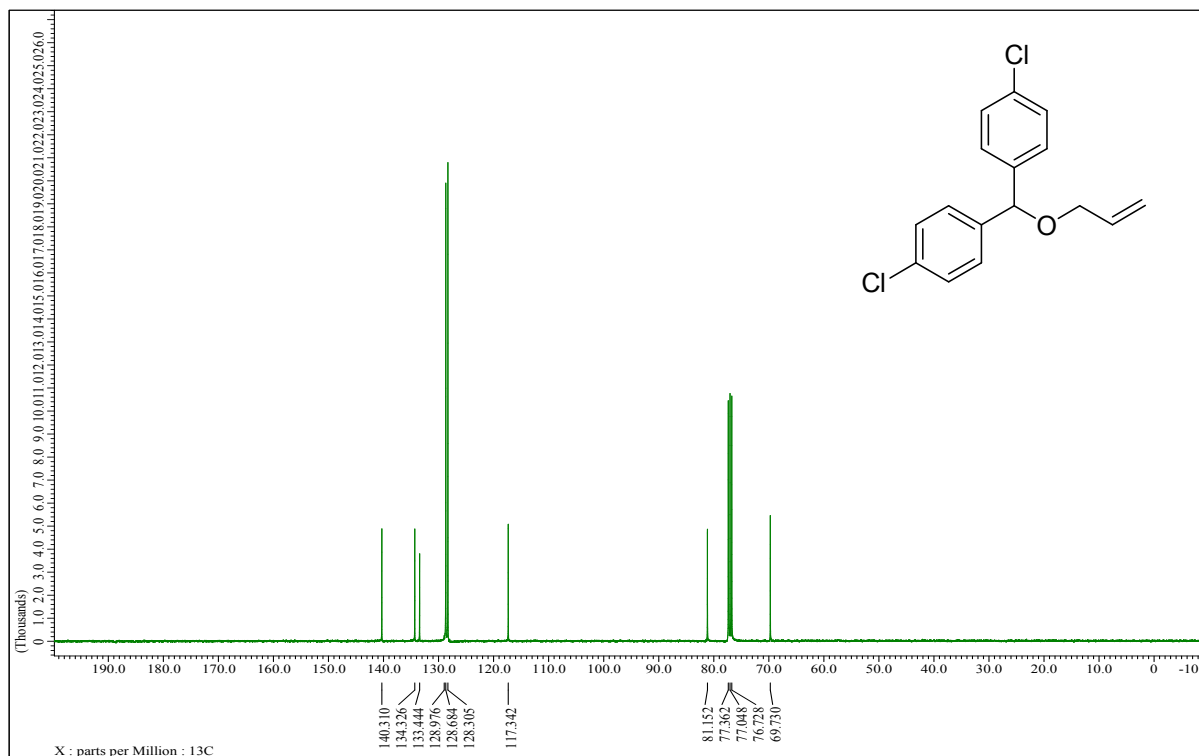

### <sup>13</sup>C NMR spectrum of 4,4'-(allyloxymethylene)bis(chlorobenzene) (**6l**)

## Benzhydryl(butyl)sulfane (8)

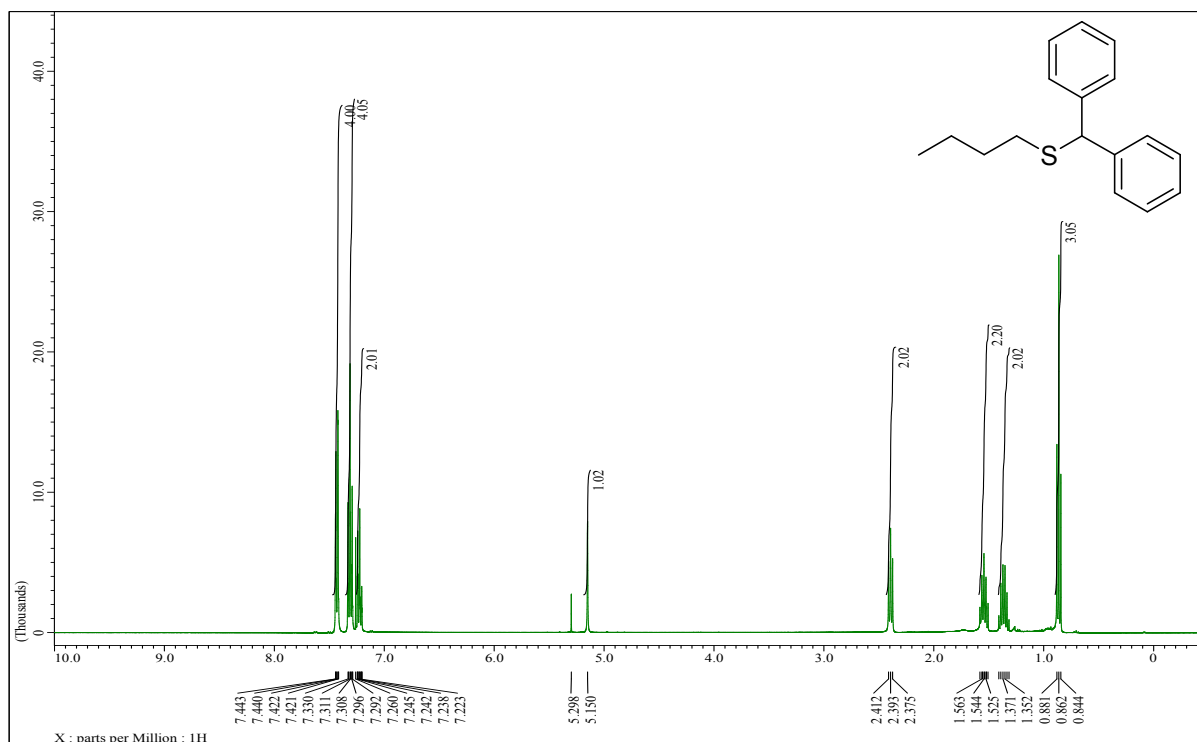

## <sup>1</sup>H NMR spectrum of benzhydryl(butyl)sulfane (8)

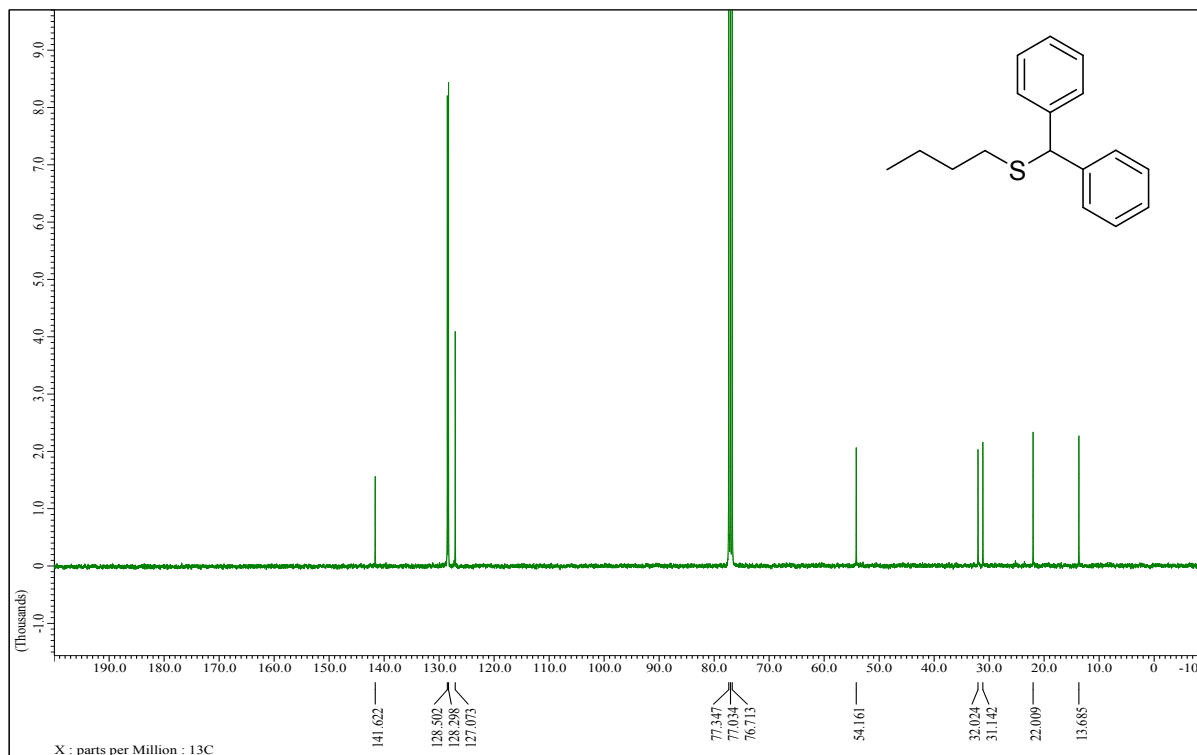

## <sup>13</sup>C NMR spectrum of benzhydryl(butyl)sulfane (8)
